# Supplementary material for: Modulations of microbehaviour by associative memory strength in Drosophila larvae
Source: PLoS One. 2019 Oct 21;14(10):e0224154. doi: 10.1371/journal.pone.0224154 (PMC6802848; doi:10.1371/journal.pone.0224154)
Supplement: S1 Dataset — This Excel file contains all the data displayed in this study. The data underlying Figs 1, 2, 3B, 3D and 3F are shown in the first tab and organised in accordance with Fig 1. The data underlying Figs S1 and 3A are shown in the second tab; the data underlying Figs S2 and 3C are shown in the third tab; and the data underlying Figs S3 and 3E are shown in the last tab. (XLSX) [file pone.0224154.s004.xlsx]

## Sheet: Fig 1
Fig 1
This data is also used in Fig 2 and Fig 3B, D, F
Fig 1B			Fig 1C			Fig 1D			Fig 1E			Fig 1G			Fig 1H			Fig 1I			Fig 1J			Fig 1L			Fig 1M			Fig 1N			Fig 1O
Sugar concentration	Performance Index		Sugar concentration	HC Rate Index		Sugar concentration	HC Direction Index		Sugar concentration	Run Speed Index		Odour dilution	Performance Index		Odour dilution	HC Rate Index		Odour dilution	HC Direction Index		Odour dilution	Run Speed Index		Trial number	Performance Index		Trial number	HC Rate Index		Trial number	HC Direction Index		Trial number	Run Speed Index
0.2 mol / L	0.205835		0.2 mol / L	-0.0307836		0.2 mol / L	-0.391585		0.2 mol / L	0.0232813		1:2000	0.0981426		1:2000	0.0488152		1:2000	2.23463		1:2000	-0.0181911		1	0.24216		1	0.0718954		1	3.51103		1	-0.102988
0.2 mol / L	0.318313		0.2 mol / L	0.065082		0.2 mol / L	4.00525		0.2 mol / L	0.0339475		1:2000	-0.10996		1:2000	0.0332446		1:2000	2.96558		1:2000	0.0172791		1	-0.132764		1	0.0249527		1	-1.17231		1	0.0146501
0.2 mol / L	-0.0605696		0.2 mol / L	0.00740611		0.2 mol / L	1.28765		0.2 mol / L	0.0387052		1:2000	0.0583687		1:2000	-0.00999285		1:2000	-0.841348		1:2000	-0.0166115		1	0.238055		1	0.0264698		1	-1.20317		1	0.0356904
0.2 mol / L	-0.0829662		0.2 mol / L	-0.0277883		0.2 mol / L	-1.3111		0.2 mol / L	-0.0217299		1:2000	0.132127		1:2000	-0.0238265		1:2000	-1.34058		1:2000	0.0139303		1	0.19618		1	0.0188679		1	1.89013		1	0.0387816
0.2 mol / L	-0.0991568		0.2 mol / L	0.0446549		0.2 mol / L	1.81138		0.2 mol / L	-0.00135317		1:2000	0.00934194		1:2000	-0.0147271		1:2000	-0.274018		1:2000	-0.00267137		1	-0.324501		1	0.0174084		1	0.276553		1	-0.0211988
0.2 mol / L	0.208885		0.2 mol / L	0.0219148		0.2 mol / L	0.287054		0.2 mol / L	-0.0230234		1:2000	-0.18874		1:2000	-0.0835557		1:2000	-3.07139		1:2000	0.0106073		1	0.0104046		1	-0.0320464		1	0.485111		1	-0.0384771
0.2 mol / L	-0.0132388		0.2 mol / L	0.0514512		0.2 mol / L	2.04911		0.2 mol / L	-0.0031458		1:2000	0.203776		1:2000	-0.0338273		1:2000	4.27832		1:2000	0.0509599		1	-0.332216		1	-0.0453654		1	-0.44026		1	0.146925
0.2 mol / L	0.0377066		0.2 mol / L	0.00823238		0.2 mol / L	-1.60308		0.2 mol / L	0.0184373		1:2000	0.000703123		1:2000	0.0625975		1:2000	4.00426		1:2000	0.00462013		1	0.0633083		1	0.012098		1	1.1382		1	0.0686706
0.2 mol / L	0.194281		0.2 mol / L	0.0298855		0.2 mol / L	4.60184		0.2 mol / L	0.0555409		1:2000	0.0143089		1:2000	0.0549047		1:2000	-3.74086		1:2000	0.0172361		1	0.0305309		1	0.0391384		1	0.723988		1	0.00547723
0.2 mol / L	0.19799		0.2 mol / L	-0.0122672		0.2 mol / L	-0.162372		0.2 mol / L	-0.0106831		1:2000	-0.141268		1:2000	-0.0506678		1:2000	-0.11028		1:2000	-0.00511164		1	-0.00445419		1	0.0380421		1	0.276404		1	-0.00968418
0.2 mol / L	-0.0212858		0.2 mol / L	0.0101524		0.2 mol / L	0.641733		0.2 mol / L	0.0169882		1:2000	0.0485156		1:2000	-0.0310002		1:2000	-0.590029		1:2000	0.0123982		1	0.160409		1	0.00987059		1	-2.60854		1	0.0133857
0.2 mol / L	0.0338499		0.2 mol / L	0.0339028		0.2 mol / L	1.31498		0.2 mol / L	0.000188601		1:2000	-0.172076		1:2000	-0.0212635		1:2000	-0.768881		1:2000	0.0238509		1	0.100451		1	0.0894744		1	1.35887		1	0.178973
0.2 mol / L	-0.00374695		0.2 mol / L	-0.0666755		0.2 mol / L	0.245667		0.2 mol / L	-0.0164463		1:2000	-0.0505933		1:2000	0.0365932		1:2000	0.304297		1:2000	0.00868433		1	0.00578819		1	0.00858373		1	-3.65418		1	0.0176716
0.2 mol / L	0.040351		0.2 mol / L	-0.00517611		0.2 mol / L	1.26297		0.2 mol / L	-0.0207941		1:2000	-0.0724588		1:2000	-0.00304402		1:2000	1.74781		1:2000	0.0238111		1	0.480323		1	0.0921192		1	0.893316		1	0.00708702
0.2 mol / L	-0.052542		0.2 mol / L	-0.00630825		0.2 mol / L	1.42252		0.2 mol / L	-0.00943437		1:2000	-0.193409		1:2000	-0.0456359		1:2000	-1.85192		1:2000	-0.0258478		1	0.113359		1	-0.0948493		1	-2.33348		1	0.209202
0.2 mol / L	-0.0706105		0.2 mol / L	-0.0450765		0.2 mol / L	0.629176		0.2 mol / L	0.0140442		1:2000	-0.0703683		1:2000	0.0240125		1:2000	-0.224042		1:2000	-0.0335616		1	0.0845369		1	-0.03944		1	-4.11584		1	0.0345701
0.2 mol / L	0.00675002		0.2 mol / L	0.018266		0.2 mol / L	-0.179939		0.2 mol / L	-0.00574147		1:2000	0.0390305		1:2000	0.0307212		1:2000	1.0857		1:2000	0.00747713		1	0.0291873		1	0.0613626		1	-2.22762		1	-0.17692
0.2 mol / L	0.227446		0.2 mol / L	0.0412768		0.2 mol / L	2.40827		0.2 mol / L	-0.0256826		1:2000	-0.0164714		1:2000	0.156321		1:2000	-0.863472		1:2000	-0.0156995		1	0.173743		1	0.00949808		1	-0.0731879		1	-0.0134636
0.2 mol / L	0.216624		0.2 mol / L	0.0524631		0.2 mol / L	1.65999		0.2 mol / L	-0.0143626		1:2000	-0.182059		1:2000	-0.0235281		1:2000	1.48883		1:2000	0.0088761		1	-0.134427		1	-0.0146478		1	-1.4262		1	0.113148
0.2 mol / L	0.109457		0.2 mol / L	-0.05419		0.2 mol / L	-2.67596		0.2 mol / L	0.0101494		1:2000	0.158369		1:2000	-0.00443457		1:2000	-0.827929		1:2000	-0.00730438		1	0.237194		1	-0.0324325		1	-0.962127		1	0.00388726
0.2 mol / L	0.0867624		0.2 mol / L	-0.0608617		0.2 mol / L	-2.31103		0.2 mol / L	-0.0159066		1:2000	-0.27544		1:2000	0.000182718		1:2000	-4.05591		1:2000	-0.01866		1	0.174754		1	0.0433876		1	0.0522589		1	0.0601867
0.2 mol / L	0.289751		0.2 mol / L	0.0672799		0.2 mol / L	1.59361		0.2 mol / L	-0.00961129		1:2000	-0.266473		1:2000	0.00322841		1:2000	-0.213115		1:2000	0.0300219		1	-0.109879		1	0.013379		1	3.75874		1	-0.0364883
0.2 mol / L	0.306777		0.2 mol / L	-0.00813801		0.2 mol / L	2.35949		0.2 mol / L	0.0202083		1:2000	-0.0023806		1:2000	-0.0150788		1:2000	-0.6585		1:2000	0.00664925		1	0.0848464		1	0.0402921		1	0.491833		1	0.106488
0.2 mol / L	0.177208		0.2 mol / L	0.0428365		0.2 mol / L	2.32168		0.2 mol / L	0.00817051		1:2000	0.0226382		1:2000	0.0089127		1:2000	2.38653		1:2000	0.0341131		1	0.176959		1	0.00499008		1	0.856687		1	0.00664141
0.2 mol / L	-0.0859387		0.2 mol / L	-0.01976		0.2 mol / L	-0.516966		0.2 mol / L	0.0140199		1:2000	0.312823		1:2000	-0.0457387		1:2000	-2.81375		1:2000	-0.00655098		1	-0.199247		1	-0.00934838		1	1.15676		1	-0.0204782
0.2 mol / L	-0.114688		0.2 mol / L	-0.0372002		0.2 mol / L	-2.77372		0.2 mol / L	-0.0039692		1:2000	0.105265		1:2000	0.0165115		1:2000	-1.66764		1:2000	-0.0157741		1	-0.135478		1	-0.0597976		1	-1.20766		1	0.307361
0.2 mol / L	-0.0825596		0.2 mol / L	0.0244937		0.2 mol / L	0.294095		0.2 mol / L	-0.00201369		1:2000	0.00324187		1:2000	0.0184357		1:2000	-2.52021		1:2000	-0.0314891		1	0.345896		1	0.036941		1	3.37035		1	0.0189756
0.2 mol / L	0.0413447		0.2 mol / L	-0.00724318		0.2 mol / L	-0.154286		0.2 mol / L	0.00674144		1:2000	-0.174185		1:2000	-0.033002		1:2000	-0.693507		1:2000	0.00401307		1	0.157514		1	0.0141862		1	0.220119		1	0.0267551
0.2 mol / L	0.135419		0.2 mol / L	-0.0205397		0.2 mol / L	0.913035		0.2 mol / L	0.0249708		1:2000	0.0795074		1:2000	0.0160058		1:2000	1.27597		1:2000	0.00957141		1	0.295157		1	0.0448372		1	2.53556		1	-0.00303257
0.2 mol / L	0.228966		0.2 mol / L	0.0562655		0.2 mol / L	1.74234		0.2 mol / L	0.0135562		1:2000	0.148823		1:2000	0.0253835		1:2000	0.520756		1:2000	-0.0204617		1	0.149392		1	0.0412801		1	1.65428		1	0.00949876
0.2 mol / L	0.020213		0.2 mol / L	-0.0671029		0.2 mol / L	1.28908		0.2 mol / L	0.0259673		1:2000	0.160951		1:2000	0.043124		1:2000	-0.683993		1:2000	-0.0159373		1	0.0682475		1	0.00683201		1	-0.361441		1	0.0269058
0.2 mol / L	0.345015		0.2 mol / L	0.0365706		0.2 mol / L	2.9654		0.2 mol / L	0.00784324		1:2000	0.152267		1:2000	0.0477846		1:2000	2.60897		1:2000	0.0344841		1	0.241996		1	0.0622558		1	2.29661		1	-0.0147315
0.2 mol / L			0.2 mol / L			0.2 mol / L			0.2 mol / L			1:2000	0.188216		1:2000	0.0494347		1:2000	0.747486		1:2000	0.00814002		1			1			1			1
0.2 mol / L	0.108931		0.2 mol / L	0.0143786		0.2 mol / L	-0.594526		0.2 mol / L	-0.00615434		1:2000	-0.132407		1:2000	-0.013816		1:2000	-2.69331		1:2000	0.036209		1	0.408342		1	0.0124737		1	1.76379		1	-0.13736
0.2 mol / L	0.0120795		0.2 mol / L	0.00104916		0.2 mol / L	-0.197264		0.2 mol / L	0.0129354		1:2000	-0.0835514		1:2000	0.0842438		1:2000	-0.0193777		1:2000	-0.0579473		1	-0.232591		1	-0.0850223		1	-2.87264		1	0.00413938
0.2 mol / L	-0.0324021		0.2 mol / L	-0.00658983		0.2 mol / L	-0.538659		0.2 mol / L	-0.0341186		1:2000	-0.235727		1:2000	-0.03772		1:2000	-0.766383		1:2000	-0.017129		1	0.413856		1	0.0662109		1	1.75446		1	0.0032613
0.2 mol / L	0.305101		0.2 mol / L	-0.029406		0.2 mol / L	-0.28743		0.2 mol / L	0.0235973		1:2000	-0.000427933		1:2000	0.026213		1:2000	2.12317		1:2000	-0.0024061		1	0.172707		1	0.0440423		1	1.37209		1	0.0515043
0.2 mol / L			0.2 mol / L			0.2 mol / L			0.2 mol / L			1:2000	-0.153304		1:2000	0.0425443		1:2000	4.57155		1:2000	0.0586109		1	0.132303		1	0.0192007		1	1.13896		1	0.00587112
0.2 mol / L	-0.050021		0.2 mol / L	-0.0585149		0.2 mol / L	-3.75622		0.2 mol / L	-0.00595104		1:2000	-0.0999384		1:2000	0.0647568		1:2000	-1.13914		1:2000	-0.0132761		1	-0.0267934		1	0.020943		1	0.874849		1	0.0481178
0.2 mol / L	0.342472		0.2 mol / L	-0.029064		0.2 mol / L	-0.773472		0.2 mol / L	0.00307747		1:2000	-0.000897861		1:2000	-0.0298215		1:2000	-3.41055		1:2000	0.00475896		1			1			1			1
0.2 mol / L	0.158326		0.2 mol / L	-0.0240419		0.2 mol / L	-2.46702		0.2 mol / L	-0.0243718		1:2000			1:2000			1:2000			1:2000			1	-0.0749908		1	-0.0228637		1	-3.32406		1	0.00956826
0.2 mol / L	-0.0649407		0.2 mol / L	0.0154436		0.2 mol / L	-2.43944		0.2 mol / L	-0.0276733		1:2000	-0.22393		1:2000	-0.0344513		1:2000	4.81056		1:2000	-0.00781788		1	0.0834955		1	-0.0376691		1	-0.404154		1	-0.0459358
0.2 mol / L	0.137276		0.2 mol / L	0.0918243		0.2 mol / L	8.8983		0.2 mol / L	0.0262288		1:2000	-0.392592		1:2000	-0.0063137		1:2000	0.0900332		1:2000	-0.00116049		1	0.0043108		1	0.0760634		1	4.3654		1	0.0143686
0.2 mol / L	0.163792		0.2 mol / L	0.0764129		0.2 mol / L	1.18152		0.2 mol / L	0.0161039		1:2000	0.0327476		1:2000	-0.00238363		1:2000	1.83023		1:2000	0.0241671		1	0.200214		1	0.0511897		1	2.61373		1	-0.0445714
0.2 mol / L	0.210933		0.2 mol / L	0.0130461		0.2 mol / L	-2.27083		0.2 mol / L	-0.0168471		1:2000	-0.156268		1:2000	-0.0144497		1:2000	3.79276		1:2000	-0.00248366		1	0.162661		1	0.0417497		1	4.82529		1	-0.0858522
0.2 mol / L	0.28232		0.2 mol / L	-0.0465005		0.2 mol / L	0.571908		0.2 mol / L	0.0255225		1:2000	-0.0237935		1:2000	0.0372008		1:2000	2.1853		1:2000	-0.00791861		1	0.208553		1	-0.0280108		1	-2.12		1	0.0338368
0.2 mol / L	-0.359769		0.2 mol / L	0.0312115		0.2 mol / L	-1.06739		0.2 mol / L	-0.00201146		1:2000	-0.0206888		1:2000	0.0804517		1:2000	2.66715		1:2000	0.00220718		1	0.509644		1	-0.0304479		1	2.20866		1	0.000774879
0.2 mol / L	0.0187213		0.2 mol / L	0.0679042		0.2 mol / L	-0.82624		0.2 mol / L	-0.0164903		1:2000	0.124159		1:2000	0.117486		1:2000	4.84951		1:2000	0.00853034		1	0.0757333		1	0.103023		1	6.97289		1	0.0543444
0.2 mol / L	-0.208173		0.2 mol / L	0.0198428		0.2 mol / L	0.392967		0.2 mol / L	0.00978019		1:2000	0.243301		1:2000	0.0387648		1:2000	1.74271		1:2000	0.0170066		1	-0.150246		1	0.0294991		1	3.65772		1	-0.0033027
0.2 mol / L	0.0609985		0.2 mol / L	-0.0322165		0.2 mol / L	0.68798		0.2 mol / L	0.0129919		1:2000	0.288146		1:2000	0.0592611		1:2000	2.20396		1:2000	-0.000788995		1	0.038136		1	-0.0050063		1	-2.21831		1	-0.00193006
0.2 mol / L	0.164654		0.2 mol / L	-0.024467		0.2 mol / L	0.477039		0.2 mol / L	-0.0129651		1:2000	0.361341		1:2000	0.0350085		1:2000	1.75793		1:2000	0.00703256		1	0.339294		1	0.0217245		1	1.27879		1	-0.0107603
0.2 mol / L	-0.263006		0.2 mol / L	0.0328807		0.2 mol / L	-0.986486		0.2 mol / L	-0.00927906		1:2000	-0.0512313		1:2000	0.0450399		1:2000	2.50256		1:2000	-0.00909667		1	0.0470658		1	0.0280174		1	-1.5534		1	-0.0696961
0.2 mol / L	0.14372		0.2 mol / L	-0.0833794		0.2 mol / L	-1.41172		0.2 mol / L	0.00774678		1:2000			1:2000			1:2000			1:2000			1	0.117235		1	0.0127915		1	0.819171		1	-0.00411124
0.2 mol / L	0.159593		0.2 mol / L	-0.0155287		0.2 mol / L	0.163991		0.2 mol / L	-0.00643754		1:2000	0.198393		1:2000	0.0276467		1:2000	-0.186934		1:2000	-0.0139959		1	0.243839		1	0.0545009		1	2.07881		1	0.0162616
0.2 mol / L	-0.116007		0.2 mol / L	-0.0353294		0.2 mol / L	1.15051		0.2 mol / L	-0.0178282		1:2000	-0.0936113		1:2000	-0.0591147		1:2000	-2.26322		1:2000	-0.00295819
0.2 mol / L	0.113582		0.2 mol / L	0.0272843		0.2 mol / L	-0.753511		0.2 mol / L	-0.0115054		1:2000	0.191619		1:2000	-0.0113405		1:2000	-0.00377131		1:2000	0.00358249		2	-0.00122048		2	0.00268089		2	0.384587		2	0.0767647
0.2 mol / L	-0.00719528		0.2 mol / L	-0.0338532		0.2 mol / L	-0.0626714		0.2 mol / L	-0.0109441		1:2000	0.351615		1:2000	0.0529604		1:2000	1.49306		1:2000	0.0193577		2	-0.0435836		2	-0.0209561		2	1.81553		2	0.0833123
												1:2000	0.080645		1:2000	0.0457825		1:2000	1.46586		1:2000	0.00101387		2	-0.173994		2	-0.0492564		2	-1.6604		2	-0.00545718
0.6 mol / L	0.17714		0.6 mol / L	0.0122179		0.6 mol / L	-0.0699627		0.6 mol / L	-0.039929		1:2000	0.169684		1:2000	0.0427416		1:2000	0.750861		1:2000	-0.00583096		2	-0.112402		2	0.00380478		2	-6.43911		2	0.00192611
0.6 mol / L	-0.230476		0.6 mol / L	-0.0349913		0.6 mol / L	-0.296037		0.6 mol / L	0.0050057														2	-0.135812		2	0.0449963		2	-2.24749		2	-0.0905557
0.6 mol / L	0.15164		0.6 mol / L	0.149687		0.6 mol / L	1.53452		0.6 mol / L	-0.0133922		1:200	0.252347		1:200	0.032955		1:200	2.57239		1:200	-0.0230933		2	-0.106405		2	0.114804		2	-0.272528		2	-0.0542821
0.6 mol / L	0.204615		0.6 mol / L	-0.0157512		0.6 mol / L	2.458		0.6 mol / L	0.0111613		1:200	0.218403		1:200	0.0085648		1:200	2.54447		1:200	0.0568215		2	0.268949		2	0.0697573		2	1.10019		2	-0.11259
0.6 mol / L	-0.0066612		0.6 mol / L	-0.0162679		0.6 mol / L	3.51322		0.6 mol / L	0.016719		1:200	0.338053		1:200	-0.0134656		1:200	2.01922		1:200	-0.00705206		2	0.18913		2	-0.00457532		2	-1.65597		2	0.0434714
0.6 mol / L	0.0133259		0.6 mol / L	0.0173019		0.6 mol / L	2.53361		0.6 mol / L	0.0143857		1:200	0.0119438		1:200	0.00188083		1:200	-1.5519		1:200	-0.00579408		2	0.136425		2	0.152065		2	0.299716		2	-0.0288675
0.6 mol / L	0.50196		0.6 mol / L	0.020387		0.6 mol / L	0.625753		0.6 mol / L	0.00901272		1:200	0.16633		1:200	0.00220046		1:200	0.992249		1:200	0.0138205		2	0.303755		2	0.0185013		2	0.329283		2	-0.00271425
0.6 mol / L	0.000729519		0.6 mol / L	-0.00955568		0.6 mol / L	0.195068		0.6 mol / L	0.0461053		1:200	0.231345		1:200	-0.0190494		1:200	-3.28476		1:200	0.00485118		2	0.180838		2	-0.0445321		2	0.409806		2	-0.0520872
0.6 mol / L	0.226836		0.6 mol / L	0.0189593		0.6 mol / L	-1.59606		0.6 mol / L	-0.0114999		1:200	0.186742		1:200	-0.0378187		1:200	3.5518		1:200	0.01484		2	0.0671819		2	0.0168052		2	1.61191		2	0.0188735
0.6 mol / L	0.031523		0.6 mol / L	-0.0632261		0.6 mol / L	-2.11945		0.6 mol / L	-0.0135366		1:200	-0.171983		1:200	-0.119344		1:200	-1.97603		1:200	0.00474279		2	0.357488		2	0.0245143		2	2.33502		2	0.150706
0.6 mol / L	0.309812		0.6 mol / L	0.0882567		0.6 mol / L	4.43797		0.6 mol / L	-0.0139988		1:200	-0.282105		1:200	0.0147815		1:200	-0.702933		1:200	-0.0101068		2	0.0606755		2	-0.032099		2	-1.57245		2	0.122639
0.6 mol / L	0.0534316		0.6 mol / L	0.0147726		0.6 mol / L	0.14116		0.6 mol / L	0.0111182		1:200	0.0312544		1:200	0.0403348		1:200	0.324275		1:200	0.0541437		2	-0.0408686		2	-0.0435477		2	2.69322		2	-0.0496077
0.6 mol / L	-0.149434		0.6 mol / L	0.0393365		0.6 mol / L	0.84904		0.6 mol / L	-0.00561202		1:200	-0.0260234		1:200	0.00771251		1:200	-0.578884		1:200	0.00851732		2	0.101733		2	-0.0615928		2	-0.701183		2	0.0332967
0.6 mol / L	0.168111		0.6 mol / L	0.0730878		0.6 mol / L	-0.125219		0.6 mol / L	-0.00446026		1:200	0.272566		1:200	0.0936643		1:200	2.07995		1:200	-0.038488		2	0.30691		2	0.0197203		2	3.48119		2	0.0688921
0.6 mol / L	0.110354		0.6 mol / L	0.0222734		0.6 mol / L	2.3571		0.6 mol / L	0.0125205		1:200	0.196529		1:200	0.0335386		1:200	2.46382		1:200	-0.00558773		2	0.495017		2	0.0148544		2	-0.0162077		2	0.168186
0.6 mol / L	-0.181648		0.6 mol / L	-0.053748		0.6 mol / L	-3.12353		0.6 mol / L	0.0079826		1:200	0.314235		1:200	0.0451088		1:200	0.874875		1:200	-0.017784		2	0.0578004		2	0.0935893		2	0.203244		2	0.0427059
0.6 mol / L	0.289762		0.6 mol / L	-0.00504498		0.6 mol / L	1.30295		0.6 mol / L	-0.0212021		1:200	0.0855103		1:200	0.0258259		1:200	0.116282		1:200	-0.00288351		2	-0.0177057		2	0.0262104		2	-1.06965		2	0.264832
0.6 mol / L	-0.00710192		0.6 mol / L	0.0574122		0.6 mol / L	0.595098		0.6 mol / L	0.00402262		1:200	0.0234208		1:200	-0.00479525		1:200	-1.37986		1:200	-0.00993584		2	0.408613		2	0.0875063		2	-1.63543		2	-0.0277221
0.6 mol / L	0.186152		0.6 mol / L	0.0868994		0.6 mol / L	2.00851		0.6 mol / L	0.00611588		1:200	0.0160597		1:200	-0.0370546		1:200	0.0865556		1:200	-0.00377634		2	0.088383		2	0.073871		2	4.29204		2	-0.0217067
0.6 mol / L	0.24207		0.6 mol / L	0.0303059		0.6 mol / L	4.30213		0.6 mol / L	-0.00382732		1:200	0.141359		1:200	-0.0152935		1:200	0.777344		1:200	0.0297623		2	0.0938392		2	0.0320479		2	1.91265		2	-0.0336122
0.6 mol / L	0.392213		0.6 mol / L	-0.0292933		0.6 mol / L	2.57791		0.6 mol / L	0.00405314		1:200	-0.125336		1:200	-0.0130277		1:200	0.99383		1:200	0.00701463		2	0.487902		2	-0.0225808		2	2.38991		2	0.122423
0.6 mol / L	0.27142		0.6 mol / L	0.108956		0.6 mol / L	4.66493		0.6 mol / L	0.00318744		1:200	-0.21262		1:200	0.0305813		1:200	-3.07113		1:200	0.00651891		2	0.212078		2	0.0235713		2	-0.454325		2	0.0669538
0.6 mol / L	0.0913286		0.6 mol / L	0.0464639		0.6 mol / L	2.41091		0.6 mol / L	-0.000465001		1:200	0.27007		1:200	-0.000697796		1:200	3.10377		1:200	-0.00861982		2	0.151925		2	0.0304681		2	0.115064		2	-0.0487284
0.6 mol / L	0.274951		0.6 mol / L	0.0268609		0.6 mol / L	0.0342886		0.6 mol / L	0.0169762		1:200	-0.0432944		1:200	0.00161508		1:200	-0.619356		1:200	0.0276192		2	0.246141		2	0.0400765		2	0.527892		2	0.162893
0.6 mol / L	0.160101		0.6 mol / L	0.0557309		0.6 mol / L	1.63246		0.6 mol / L	-0.00685304		1:200	-0.0229388		1:200	0.142563		1:200	0.886382		1:200	0.0185384		2	-0.0476459		2	0.00606742		2	-0.573537		2	0.00467814
0.6 mol / L	0.28393		0.6 mol / L	0.0782118		0.6 mol / L	2.76141		0.6 mol / L	-0.0190873		1:200	-0.0594121		1:200	0.0431783		1:200	-1.94519		1:200	0.00649298		2	0.329334		2	0.0414487		2	1.58373		2	0.0924429
0.6 mol / L	0.0206791		0.6 mol / L	0.0661068		0.6 mol / L	0.0238116		0.6 mol / L	-0.0240211		1:200	0.0719204		1:200	0.088772		1:200	2.90037		1:200	0.0155174		2	0.315979		2	0.0558367		2	1.49495		2	0.0361256
0.6 mol / L	0.0656025		0.6 mol / L	0.0192232		0.6 mol / L	-1.07388		0.6 mol / L	0.00840471		1:200	-0.185643		1:200	0.00887121		1:200	-1.37841		1:200	0.0307215		2	-0.346201		2	0.0194931		2	4.9721		2	-0.00292887
0.6 mol / L	0.0630118		0.6 mol / L	0.00790771		0.6 mol / L	-0.73789		0.6 mol / L	-0.0113867		1:200	-0.0427401		1:200	-0.00144044		1:200	-0.66026		1:200	-0.00593994		2	0.243697		2	0.0278795		2	1.13685		2	0.0245867
0.6 mol / L	0.265173		0.6 mol / L	0.0164547		0.6 mol / L	1.5969		0.6 mol / L	0.00596762		1:200	0.250171		1:200	0.0560721		1:200	2.58761		1:200	0.00404903		2	0.547778		2	0.0174643		2	1.08748		2	-0.081643
0.6 mol / L	0.0516532		0.6 mol / L	0.0290109		0.6 mol / L	1.71202		0.6 mol / L	0.0386701		1:200	0.143085		1:200	0.0101004		1:200	1.92847		1:200	0.00530267		2	0.212601		2	0.00975829		2	0.702273		2	-0.0610013
0.6 mol / L	0.138919		0.6 mol / L	0.0138504		0.6 mol / L	-1.41162		0.6 mol / L	0.00768705		1:200	0.0598861		1:200	0.0698034		1:200	3.73137		1:200	-0.0122344		2	0.286537		2	0.0676077		2	0.811889		2	0.00260194
0.6 mol / L			0.6 mol / L			0.6 mol / L			0.6 mol / L			1:200	0.0400013		1:200	0.0242269		1:200	3.22266		1:200	0.0011278		2	0.384281		2	0.0936433		2	4.04518		2	0.066076
0.6 mol / L	0.187936		0.6 mol / L	-0.019543		0.6 mol / L	1.826		0.6 mol / L	0.0279063		1:200	-0.0421395		1:200	0.0324541		1:200	1.82062		1:200	-0.0172424		2	0.236354		2	0.047984		2	-0.621291		2	0.0546935
0.6 mol / L	-0.0559207		0.6 mol / L	-0.0251447		0.6 mol / L	0.473113		0.6 mol / L	-0.00180177		1:200	0.215309		1:200	0.0211515		1:200	4.26311		1:200	-0.0143206		2	0.0274206		2	0.00684821		2	3.01703		2	0.086051
0.6 mol / L	0.0880943		0.6 mol / L	0.0472354		0.6 mol / L	-0.746375		0.6 mol / L	0.0389622		1:200	0.314066		1:200	0.0170139		1:200	3.44132		1:200	-0.000202085		2	0.61673		2	-0.0391356		2	-1.66459		2	-0.0554933
0.6 mol / L	0.0931801		0.6 mol / L	0.0438279		0.6 mol / L	1.81112		0.6 mol / L	0.00272728		1:200	0.106573		1:200	0.0817016		1:200	0.913595		1:200	0.0383424		2	0.409627		2	-0.00864215		2	0.581339		2	-0.0449981
0.6 mol / L			0.6 mol / L			0.6 mol / L			0.6 mol / L			1:200	0.0804622		1:200	-0.0339837		1:200	-0.5572		1:200	-0.00848148		2	0.435039		2	0.0539557		2	3.65119		2	0.113907
0.6 mol / L	-0.0888557		0.6 mol / L	0.121109		0.6 mol / L	2.12537		0.6 mol / L	0.000719787		1:200	0.255512		1:200	0.00268251		1:200	3.65352		1:200	0.00819809		2	0.217746		2	0.0557396		2	-0.661298		2	-0.167208
0.6 mol / L	0.260874		0.6 mol / L	0.0535178		0.6 mol / L	1.85989		0.6 mol / L	-0.0324207		1:200	-0.167179		1:200	0.0813178		1:200	1.75584		1:200	0.00201092		2	0.212919		2	-0.0265485		2	-1.46992		2	0.0302459
0.6 mol / L	0.154859		0.6 mol / L	0.00885362		0.6 mol / L	0.288853		0.6 mol / L	0.00187242		1:200	0.104765		1:200	0.0258473		1:200	1.84369		1:200	0.00200661		2	0.140065		2	0.0640787		2	1.00445		2	0.0932376
0.6 mol / L	0.318399		0.6 mol / L	0.065633		0.6 mol / L	5.54742		0.6 mol / L	0.00483372		1:200	-0.161584		1:200	0.0161088		1:200	-1.82046		1:200	-0.0515589		2			2			2			2
0.6 mol / L	0.10294		0.6 mol / L	-0.0013092		0.6 mol / L	-1.60936		0.6 mol / L	0.00890553		1:200	0.0570776		1:200	0.111284		1:200	3.87342		1:200	-0.0332158		2	0.378394		2	0.0601902		2	7.35134		2	0.0627392
0.6 mol / L	0.0348599		0.6 mol / L	0.0600782		0.6 mol / L	2.27467		0.6 mol / L	-0.00677805		1:200	0.0291002		1:200	0.138766		1:200	5.27146		1:200	0.00108357		2	0.121663		2	-0.0153016		2	0.217738		2	-0.0167507
0.6 mol / L	0.194304		0.6 mol / L	-0.00832615		0.6 mol / L	6.24526		0.6 mol / L	0.0186377		1:200	-0.0159519		1:200	-0.0664748		1:200	-2.917		1:200	0.0199187		2	0.379821		2	0.0370608		2	3.15203		2	0.00339069
0.6 mol / L	-0.272745		0.6 mol / L	0.0677077		0.6 mol / L	-0.0533794		0.6 mol / L	0.00687441		1:200	0.00742593		1:200	0.0450299		1:200	1.57873		1:200	-0.0102765		2	-0.00554752		2	-0.0493857		2	0.893144		2	0.05225
0.6 mol / L	0.03542		0.6 mol / L	-0.0264145		0.6 mol / L	0.480319		0.6 mol / L	0.0513937		1:200	0.145411		1:200	0.0435422		1:200	1.58265		1:200	-0.0206121		2	-0.0178095		2	0.0911671		2	-0.850568		2	-0.163505
0.6 mol / L	0.125573		0.6 mol / L	0.0150247		0.6 mol / L	1.17402		0.6 mol / L	-0.0130945		1:200	0.303461		1:200	0.0376578		1:200	2.68182		1:200	-0.043635		2	0.0692722		2	-0.0260382		2	-0.632371		2	-0.0122521
0.6 mol / L	0.149582		0.6 mol / L	0.118737		0.6 mol / L	7.29738		0.6 mol / L	0.0196424		1:200	0.186005		1:200	0.0453633		1:200	2.79476		1:200	7.99136e-05		2	0.118327		2	-0.014364		2	-1.5276		2	0.087901
0.6 mol / L	-0.127727		0.6 mol / L	0.0624405		0.6 mol / L	0.387687		0.6 mol / L	-0.00409008		1:200	0.269122		1:200	0.110318		1:200	9.06935		1:200	-0.00346497		2	0.22446		2	0.00543864		2	4.63947		2	0.11178
0.6 mol / L	-0.102326		0.6 mol / L	-0.00773699		0.6 mol / L	2.65418		0.6 mol / L	0.0620828		1:200	0.213386		1:200	-0.0328265		1:200	-1.8981		1:200	-0.0152932
0.6 mol / L	0.127843		0.6 mol / L	0.100141		0.6 mol / L	1.0309		0.6 mol / L	-0.0272802		1:200	0.579035		1:200	0.0781719		1:200	2.55207		1:200	1.8077e-05		3	0.122527		3	0.0591031		3	2.61859		3	-0.0341929
0.6 mol / L	0.15725		0.6 mol / L	0.0579238		0.6 mol / L	2.4761		0.6 mol / L	0.00467729		1:200	0.412206		1:200	0.0673969		1:200	0.0372658		1:200	-0.0104754		3	-0.0154443		3	0.00135504		3	0.15734		3	0.14218
0.6 mol / L	0.517725		0.6 mol / L	0.0380536		0.6 mol / L	1.21382		0.6 mol / L	0.00546508		1:200	0.240922		1:200	0.0365698		1:200	1.32285		1:200	-0.0268143		3	0.0589841		3	0.0272225		3	2.70857		3	-0.155491
0.6 mol / L	0.295164		0.6 mol / L	0.0209475		0.6 mol / L	0.438547		0.6 mol / L	0.037981		1:200	0.101707		1:200	0.0452597		1:200	1.68834		1:200	-0.00954429		3	-0.0954668		3	-0.0376945		3	1.1162		3	0.0298245
0.6 mol / L	0.276441		0.6 mol / L	0.041602		0.6 mol / L	3.55908		0.6 mol / L	0.0122576		1:200	0.136535		1:200	0.0345454		1:200	2.25686		1:200	0.00462797		3	0.376853		3	0.141566		3	4.35985		3	-0.149723
0.6 mol / L	0.0293403		0.6 mol / L	0.0898633		0.6 mol / L	2.30164		0.6 mol / L	0.00399541		1:200	-0.0365514		1:200	0.0261142		1:200	1.64755		1:200	0.0167165		3	-0.0503759		3	0.0931279		3	5.08198		3	-0.0411706
												1:200	0.451509		1:200	0.0397546		1:200	2.90022		1:200	0.00247259		3	0.0720687		3	-0.00612846		3	-0.0266661		3	0.018285
2.0 mol / L	0.354603		2.0 mol / L	0.0260914		2.0 mol / L	1.88577		2.0 mol / L	0.0387424		1:200	0.396989		1:200	0.031127		1:200	2.00622		1:200	0.0129828		3	0.107214		3	-0.0582607		3	-1.36181		3	-0.0166373
2.0 mol / L	0.156939		2.0 mol / L	-0.0437251		2.0 mol / L	-1.03132		2.0 mol / L	-0.0087499		1:200	0.204357		1:200	0.0675434		1:200	1.87061		1:200	0.014269		3	-0.0222964		3	-0.00259508		3	1.0476		3	-0.0644215
2.0 mol / L	0.482733		2.0 mol / L	0.0580005		2.0 mol / L	4.11554		2.0 mol / L	-0.0116127														3	0.0281922		3	0.0456252		3	-2.46994		3	0.0951387
2.0 mol / L	0.127273		2.0 mol / L	0.0389452		2.0 mol / L	3.15156		2.0 mol / L	0.0354238		1:20	-0.0321892		1:20	0.0675594		1:20	2.56213		1:20	0.0264218		3	0.347588		3	0.0371395		3	5.60086		3	0.0546771
2.0 mol / L	-0.0772948		2.0 mol / L	0.0497939		2.0 mol / L	2.28221		2.0 mol / L	0.0221347		1:20	0.232583		1:20	0.0452007		1:20	1.55884		1:20	0.00704301		3	0.0513798		3	0.0123122		3	1.53004		3	0.452628
2.0 mol / L	0.208885		2.0 mol / L	0.0653475		2.0 mol / L	1.71537		2.0 mol / L	0.0141143		1:20	0.167899		1:20	0.0598915		1:20	0.298521		1:20	0.0145255		3	0.422494		3	0.103043		3	4.90206		3	0.0207879
2.0 mol / L	0.410569		2.0 mol / L	0.144498		2.0 mol / L	6.07628		2.0 mol / L	0.0112977		1:20	0.176145		1:20	0.0834314		1:20	3.23136		1:20	0.0242034		3	-0.623387		3	-0.0638473		3	-6.37218		3	0.0646259
2.0 mol / L	0.187912		2.0 mol / L	0.097833		2.0 mol / L	2.40728		2.0 mol / L	-0.00515228		1:20	0.126308		1:20	0.0496227		1:20	4.04338		1:20	0.00985353		3	-0.30481		3	-0.0567715		3	-0.459359		3	-0.116415
2.0 mol / L	0.232949		2.0 mol / L	0.0381643		2.0 mol / L	0.585135		2.0 mol / L	-0.0187195		1:20	-0.109148		1:20	0.0477334		1:20	2.03744		1:20	-0.0087454		3	0.0965206		3	0.00784165		3	-2.68297		3	-0.223893
2.0 mol / L	0.188511		2.0 mol / L	0.0699201		2.0 mol / L	2.72242		2.0 mol / L	0.00623342		1:20			1:20			1:20			1:20			3	-0.133873		3	-0.12855		3	-1.12976		3	0.278721
2.0 mol / L	-0.0473946		2.0 mol / L	0.0519491		2.0 mol / L	3.31375		2.0 mol / L	0.00442827		1:20	0.183827		1:20	0.115953		1:20	5.46116		1:20	0.0134174		3	0.146326		3	-0.0442244		3	0.483434		3	-0.197999
2.0 mol / L	0.293809		2.0 mol / L	0.150944		2.0 mol / L	1.99487		2.0 mol / L	0.00297641		1:20	-0.0869417		1:20	0.046713		1:20	4.4949		1:20	0.00371879		3	0.199242		3	-0.0200351		3	0.45878		3	0.0899534
2.0 mol / L	0.223175		2.0 mol / L	0.050827		2.0 mol / L	1.53127		2.0 mol / L	-0.0166989		1:20	-0.0082595		1:20	0.0927188		1:20	5.50262		1:20	-0.0354961		3	0.488326		3	-0.0277131		3	2.845		3	0.0357144
2.0 mol / L	0.200738		2.0 mol / L	0.0244192		2.0 mol / L	0.717978		2.0 mol / L	0.0129698		1:20	-0.000420061		1:20	-0.0399659		1:20	1.77728		1:20	0.00740338		3	-0.036871		3	0.0136103		3	0.466968		3	-0.0397793
2.0 mol / L	0.432619		2.0 mol / L	0.0936546		2.0 mol / L	3.16374		2.0 mol / L	0.0131026		1:20	0.174418		1:20	0.0296789		1:20	3.45387		1:20	0.0287799		3	-0.0138989		3	-0.00340645		3	2.15766		3	-0.0408069
2.0 mol / L	0.201962		2.0 mol / L	0.0115912		2.0 mol / L	2.01713		2.0 mol / L	-0.0255291		1:20	0.171904		1:20	0.132585		1:20	3.53543		1:20	-0.00177344		3	0.336597		3	0.0569569		3	-1.48671		3	-0.00621951
2.0 mol / L	0.417344		2.0 mol / L	0.0899101		2.0 mol / L	3.66978		2.0 mol / L	-0.00852143		1:20	0.085365		1:20	0.0466527		1:20	2.1292		1:20	-0.00419702		3	-0.0602433		3	-0.0813675		3	-3.73644		3	0.0878727
2.0 mol / L	0.383297		2.0 mol / L	0.0458227		2.0 mol / L	0.474619		2.0 mol / L	0.00319289		1:20	0.104531		1:20	-0.00159488		1:20	-1.69848		1:20	0.0103591		3	-0.11221		3	-0.016126		3	0.00874622		3	0.0390923
2.0 mol / L	0.176687		2.0 mol / L	0.0558639		2.0 mol / L	2.98516		2.0 mol / L	-0.00588965		1:20	0.139295		1:20	0.0887845		1:20	6.01186		1:20	-0.0130582		3	0.0979429		3	-0.066481		3	-1.89947		3	-0.0537305
2.0 mol / L	0.335075		2.0 mol / L	0.00608889		2.0 mol / L	1.4763		2.0 mol / L	-0.00058411		1:20	-0.0312193		1:20	0.00282113		1:20	2.66689		1:20	0.000552992		3	0.355911		3	0.00045117		3	4.69591		3	0.0957188
2.0 mol / L	0.378191		2.0 mol / L	0.065988		2.0 mol / L	1.58264		2.0 mol / L	-0.00951227		1:20	0.155657		1:20	0.095177		1:20	3.37521		1:20	0.0373873		3	0.236755		3	0.0294227		3	4.00148		3	-0.0288924
2.0 mol / L	0.14687		2.0 mol / L	0.0812344		2.0 mol / L	2.10486		2.0 mol / L	0.000815183		1:20	0.080062		1:20	-0.0592274		1:20	1.62512		1:20	0.0159368		3	0.170664		3	0.0132138		3	1.49432		3	0.0125989
2.0 mol / L	0.0765754		2.0 mol / L	0.0683583		2.0 mol / L	3.05333		2.0 mol / L	0.0132922		1:20	-0.05613		1:20	0.0699086		1:20	2.65003		1:20	-0.00783046		3	0.147559		3	0.0278167		3	0.797487		3	0.0771163
2.0 mol / L	0.126065		2.0 mol / L	-0.00348596		2.0 mol / L	-2.62399		2.0 mol / L	0.00507678		1:20	0.0663234		1:20	0.0026116		1:20	-0.545051		1:20	-0.000947921		3	0.474973		3	0.00248959		3	0.196035		3	0.0556154
2.0 mol / L	0.476987		2.0 mol / L	0.0495036		2.0 mol / L	3.38267		2.0 mol / L	0.0331456		1:20	0.127507		1:20	0.008703		1:20	-3.06698		1:20	-0.0205054		3	0.252495		3	0.168532		3	2.844		3	-0.0595428
2.0 mol / L	0.190575		2.0 mol / L	0.0881657		2.0 mol / L	4.71587		2.0 mol / L	0.0200286		1:20	-0.0790682		1:20	-0.0516834		1:20	-2.73825		1:20	0.00538761		3	0.653876		3	0.0443263		3	2.20473		3	-0.0146651
2.0 mol / L	0.00993083		2.0 mol / L	-0.0488294		2.0 mol / L	-0.572904		2.0 mol / L	0.0215865		1:20	0.13965		1:20	0.0731858		1:20	3.88276		1:20	-0.0110367		3	0.348877		3	0.0278738		3	3.32286		3	0.0422712
2.0 mol / L	0.0155573		2.0 mol / L	0.0042606		2.0 mol / L	1.13757		2.0 mol / L	-0.0132918		1:20	0.314373		1:20	0.102441		1:20	-0.589512		1:20	-0.0427781		3	0.244749		3	0.0463331		3	2.29113		3	-0.00702466
2.0 mol / L	0.0259226		2.0 mol / L	0.0105689		2.0 mol / L	2.3586		2.0 mol / L	-0.0144112		1:20	-0.100176		1:20	0.0386017		1:20	1.80206		1:20	0.00480349		3	0.317076		3	0.0175966		3	0.902578		3	0.0556914
2.0 mol / L	0.31029		2.0 mol / L	0.0306211		2.0 mol / L	3.473		2.0 mol / L	0.0280709		1:20	0.228257		1:20	0.0290873		1:20	0.269538		1:20	0.00822871		3	-0.51815		3	-0.0137451		3	-5.07164		3	0.0277047
2.0 mol / L	0.268247		2.0 mol / L	0.032165		2.0 mol / L	1.44507		2.0 mol / L	0.012835		1:20	0.0192723		1:20	0.0452516		1:20	5.94403		1:20	0.0412039		3	0.408096		3	0.0442017		3	3.84531		3	0.0384057
2.0 mol / L	0.186823		2.0 mol / L	0.10688		2.0 mol / L	2.73209		2.0 mol / L	-0.00805644		1:20	0.279664		1:20	0.056635		1:20	4.22717		1:20	0.00859484		3	0.172002		3	0.066363		3	2.26401		3	0.0597849
2.0 mol / L	0.210654		2.0 mol / L	-0.000311859		2.0 mol / L	0.40157		2.0 mol / L	-0.0315848		1:20	-0.0865612		1:20	-0.0307261		1:20	-0.465378		1:20	0.0106395		3	0.285575		3	0.086785		3	4.35163		3	-0.101882
2.0 mol / L	0.160041		2.0 mol / L	-0.00201755		2.0 mol / L	0.460121		2.0 mol / L	0.00557671		1:20	0.0466058		1:20	0.0460824		1:20	1.41297		1:20	0.0289154		3	0.429163		3	0.107477		3	7.01435		3	0.0460893
2.0 mol / L	0.0536885		2.0 mol / L	-0.00931884		2.0 mol / L	-0.0758567		2.0 mol / L	0.00193118		1:20	0.141169		1:20	0.0712903		1:20	2.94906		1:20	0.0329177		3	0.469033		3	0.0674834		3	2.19535		3	-0.0620187
2.0 mol / L	0.355572		2.0 mol / L	0.0982243		2.0 mol / L	3.97216		2.0 mol / L	0.0248331		1:20	0.423604		1:20	0.0598863		1:20	3.68068		1:20	0.0291245		3	0.234422		3	-0.090423		3	-0.868329		3	0.0979415
2.0 mol / L	0.19601		2.0 mol / L	0.0447108		2.0 mol / L	0.109339		2.0 mol / L	-0.00159126		1:20	0.0909352		1:20	0.00840036		1:20	-1.94942		1:20	-0.0165355		3	0.419181		3	0.0132876		3	1.08995		3	0.00768141
2.0 mol / L	0.321173		2.0 mol / L	0.0875808		2.0 mol / L	3.51833		2.0 mol / L	0.0200178		1:20	0.148596		1:20	0.0175614		1:20	1.31996		1:20	-0.00425969		3	0.0542538		3	0.0549211		3	2.34092		3	-0.0441244
2.0 mol / L	0.128955		2.0 mol / L	0.00576999		2.0 mol / L	0.336153		2.0 mol / L	0.00154586		1:20	0.0221212		1:20	-0.0209752		1:20	2.69862		1:20	0.0028071		3	0.410686		3	0.0933367		3	5.91087		3	0.0331709
2.0 mol / L	0.383032		2.0 mol / L	0.15242		2.0 mol / L	4.86548		2.0 mol / L	0.00150489		1:20	0.493046		1:20	0.00858527		1:20	1.20572		1:20	0.00903973		3			3			3			3
2.0 mol / L	0.702426		2.0 mol / L	-0.133395		2.0 mol / L	-6.87326		2.0 mol / L	0.0611886		1:20			1:20			1:20			1:20			3	0.146303		3	0.0227756		3	0.0777519		3	0.159529
2.0 mol / L	0.354067		2.0 mol / L	0.0762985		2.0 mol / L	2.63977		2.0 mol / L	0.0176734		1:20	-0.153533		1:20	-0.0898934		1:20	-0.218331		1:20	0.0233883		3	0.35547		3	0.19925		3	2.74308		3	-0.0799167
2.0 mol / L	0.266395		2.0 mol / L	0.0838892		2.0 mol / L	3.24698		2.0 mol / L	-0.020314		1:20	0.0848988		1:20	-0.0235041		1:20	-0.171017		1:20	0.0538418		3	0.250434		3	0.0344715		3	6.00283		3	-0.0298988
2.0 mol / L	0.392346		2.0 mol / L	0.0972762		2.0 mol / L	3.4442		2.0 mol / L	0.0135955		1:20	0.0092587		1:20	0.0251821		1:20	2.79745		1:20	0.0215588		3	0.192316		3	0.0415696		3	-2.61328		3	0.138082
2.0 mol / L	0.26919		2.0 mol / L	0.0190721		2.0 mol / L	2.82192		2.0 mol / L	-0.000985743		1:20	0.086804		1:20	0.0463628		1:20	1.17428		1:20	0.00847407		3	0.0243782		3	-0.0662053		3	-2.35381		3	-0.073102
2.0 mol / L	0.0619023		2.0 mol / L	0.0677875		2.0 mol / L	2.1864		2.0 mol / L	0.00302697		1:20	-0.0999398		1:20	0.0175308		1:20	5.21368		1:20	0.00663458		3	0.323348		3	0.0439304		3	0.101512		3	-0.114146
2.0 mol / L	0.412249		2.0 mol / L	0.0579067		2.0 mol / L	3.85486		2.0 mol / L	0.00822541		1:20	0.4125		1:20	0.0564817		1:20	0.849354		1:20	0.0106426		3	0.350463		3	0.0694312		3	-2.00767		3	-0.0448479
2.0 mol / L	0.31119		2.0 mol / L	0.0863467		2.0 mol / L	4.3769		2.0 mol / L	-0.00252158		1:20	0.0131273		1:20	0.0107901		1:20	3.0406		1:20	-0.0236906
2.0 mol / L	0.0958715		2.0 mol / L	0.0191331		2.0 mol / L	2.21238		2.0 mol / L	0.0277403		1:20	0.516011		1:20	0.112371		1:20	2.26491		1:20	0.0316131
2.0 mol / L	-0.259208		2.0 mol / L	-0.00423959		2.0 mol / L	0.930182		2.0 mol / L	0.0195746		1:20	0.334597		1:20	-0.0154018		1:20	1.24653		1:20	-0.00843799
2.0 mol / L	0.111905		2.0 mol / L	0.0041489		2.0 mol / L	0.923856		2.0 mol / L	-0.00732848		1:20	0.00298745		1:20	0.0325696		1:20	1.59534		1:20	0.00736678
2.0 mol / L	0.273092		2.0 mol / L	0.0585521		2.0 mol / L	2.23631		2.0 mol / L	0.0166397		1:20	0.521052		1:20	0.0667927		1:20	4.09548		1:20	0.027593
2.0 mol / L	0.366399		2.0 mol / L	0.00792034		2.0 mol / L	0.754093		2.0 mol / L	0.00895563		1:20	0.298421		1:20	0.0259332		1:20	2.06048		1:20	0.0246162
2.0 mol / L	-0.00966473		2.0 mol / L	-0.012222		2.0 mol / L	1.49437		2.0 mol / L	-0.00782454		1:20	0.364406		1:20	0.0497682		1:20	2.43316		1:20	0.00727171
2.0 mol / L	0.0889927		2.0 mol / L	0.0200847		2.0 mol / L	0.0315047		2.0 mol / L	0.00659923		1:20	0.221598		1:20	0.0484522		1:20	2.96437		1:20	-0.00216907
2.0 mol / L	0.0509368		2.0 mol / L	-0.0324156		2.0 mol / L	0.548949		2.0 mol / L	-0.00639114		1:20	0.101446		1:20	-0.0686105		1:20	-1.64486		1:20	0.00104971
												1:20	0.345082		1:20	0.0573242		1:20	3.08716		1:20	0.0246038
												1:20	0.223146		1:20	0.0548057		1:20	2.71555		1:20	0.0107817
												1:20	0.475475		1:20	0.105246		1:20	3.02408		1:20	0.012601
												1:20	0.304805		1:20	0.042561		1:20	2.5793		1:20	0.0153593

## Sheet: S1 Fig
S1 Fig
This data is also used in Fig 3A
S1 Fig A				S1 Fig B				S1 Fig C				S1 Fig D
Sugar concentration	Pref Paired	Pref Unpaired		Sugar concentration	HC rate-modulation Paired	HC rate-modulation Unpaired		Sugar concentration	Reorientation per HC Paired	Reorientation per HC Unpaired		Sugar concentration	Run speed-modulation Paired	Run speed-modulation Unpaired
0.2 mol / L	0.533279	0.121609		0.2 mol / L	0.00895398	0.132088		0.2 mol / L	10.7871	12.3534		0.2 mol / L	0.0787966	-0.0143286
0.2 mol / L	0.200277	-0.43635		0.2 mol / L	0.215443	-0.0448847		0.2 mol / L	26.2803	10.2593		0.2 mol / L	0.0660549	-0.069735
0.2 mol / L	0.0815635	0.202703		0.2 mol / L	0.0118388	-0.0177856		0.2 mol / L	5.73166	0.581073		0.2 mol / L	0.0318915	-0.122929
0.2 mol / L	0.13535	0.301283		0.2 mol / L	0.050457	0.16161		0.2 mol / L	6.42797	11.6724		0.2 mol / L	0.00307332	0.089993
0.2 mol / L	0.287882	0.486195		0.2 mol / L	0.322171	0.143551		0.2 mol / L	19.3614	12.1159		0.2 mol / L	-0.033313	-0.0279003
0.2 mol / L	0.372682	-0.0450879		0.2 mol / L	0.28094	0.19328		0.2 mol / L	13.9566	12.8084		0.2 mol / L	0.00985823	0.101952
0.2 mol / L	0.130366	0.156844		0.2 mol / L	0.236696	0.0308911		0.2 mol / L	17.0323	8.83584		0.2 mol / L	-0.0080545	0.00452872
0.2 mol / L	0.122305	0.0468921		0.2 mol / L	0.337467	0.304538		0.2 mol / L	9.40058	15.8129		0.2 mol / L	0.034826	-0.0389234
0.2 mol / L	0.155347	-0.233216		0.2 mol / L	0.146763	0.0272207		0.2 mol / L	29.396	10.9886		0.2 mol / L	0.189977	-0.0321867
0.2 mol / L	0.148307	-0.247672		0.2 mol / L	0.0929012	0.14197		0.2 mol / L	8.93608	9.58557		0.2 mol / L	-0.00890398	0.0338283
0.2 mol / L	0.0239935	0.0665652		0.2 mol / L	0.160507	0.119898		0.2 mol / L	12.2962	9.72928		0.2 mol / L	0.0842427	0.0162899
0.2 mol / L	0.219334	0.151634		0.2 mol / L	0.351669	0.216058		0.2 mol / L	21.4185	16.1586		0.2 mol / L	0.0227195	0.0219651
0.2 mol / L	0.159155	0.166649		0.2 mol / L	-0.0448213	0.221881		0.2 mol / L	7.38277	6.40011		0.2 mol / L	-0.0245148	0.0412705
0.2 mol / L	0.0682503	-0.0124516		0.2 mol / L	0.22513	0.245834		0.2 mol / L	15.643	10.5912		0.2 mol / L	-0.025255	0.0579214
0.2 mol / L	0.0398514	0.144935		0.2 mol / L	0.410303	0.435536		0.2 mol / L	24.8929	19.2028		0.2 mol / L	-0.0258319	0.0119056
0.2 mol / L	0.26767	0.408891		0.2 mol / L	0.279075	0.45938		0.2 mol / L	24.7252	22.2085		0.2 mol / L	0.0836398	0.027463
0.2 mol / L	0.060362	0.046862		0.2 mol / L	0.178764	0.1057		0.2 mol / L	18.2205	18.9403		0.2 mol / L	-0.0217054	0.0012605
0.2 mol / L	0.508613	0.0537214		0.2 mol / L	0.295315	0.130207		0.2 mol / L	21.1476	11.5145		0.2 mol / L	-0.0934314	0.00929914
0.2 mol / L	0.465039	0.0317911		0.2 mol / L	0.186235	-0.0236178		0.2 mol / L	13.3437	6.70376		0.2 mol / L	0.00442311	0.0618736
0.2 mol / L	0.452931	0.234016		0.2 mol / L	0.18646	0.40322		0.2 mol / L	13.8334	24.5373		0.2 mol / L	0.0372259	-0.00337183
0.2 mol / L	0.415942	0.242417		0.2 mol / L	-0.0751345	0.168312		0.2 mol / L	7.18074	16.4249		0.2 mol / L	0.0137133	0.0773399
0.2 mol / L	0.341949	-0.237553		0.2 mol / L	0.231729	-0.0373912		0.2 mol / L	15.834	9.45961		0.2 mol / L	0.0180533	0.0564985
0.2 mol / L	0.131522	-0.482033		0.2 mol / L	0.0428972	0.0754493		0.2 mol / L	17.855	8.41698		0.2 mol / L	0.0779375	-0.00289552
0.2 mol / L	0.345951	-0.00846459		0.2 mol / L	0.291731	0.120385		0.2 mol / L	20.955	11.6683		0.2 mol / L	-0.0247256	-0.0574076
0.2 mol / L	-0.00531336	0.166564		0.2 mol / L	-0.0463698	0.0326703		0.2 mol / L	8.16468	10.2325		0.2 mol / L	0.0211807	-0.0348987
0.2 mol / L	0.0350471	0.264424		0.2 mol / L	0.0505875	0.199388		0.2 mol / L	6.51064	17.6055		0.2 mol / L	0.0293747	0.0452515
0.2 mol / L	0.150099	0.315219		0.2 mol / L	0.105821	0.00784648		0.2 mol / L	9.46234	8.28596		0.2 mol / L	0.015327	0.0233817
0.2 mol / L	0.130824	0.048135		0.2 mol / L	0.0504217	0.0793944		0.2 mol / L	12.5941	13.2113		0.2 mol / L	-0.00490862	-0.0318744
0.2 mol / L	0.308957	0.0381193		0.2 mol / L	0.0580967	0.140256		0.2 mol / L	14.4479	10.7958		0.2 mol / L	0.0954167	-0.00446656
0.2 mol / L	0.248519	-0.209414		0.2 mol / L	0.200649	-0.0244126		0.2 mol / L	7.70929	0.73994		0.2 mol / L	0.033554	-0.0206709
0.2 mol / L	0.222527	0.182101		0.2 mol / L	0.0632095	0.331621		0.2 mol / L	12.7824	7.6261		0.2 mol / L	0.0177224	-0.0861467
0.2 mol / L	0.48178	-0.208249		0.2 mol / L	0.21024	0.0639576		0.2 mol / L	16.178	4.31639		0.2 mol / L	0.0996755	0.0683025
0.2 mol / L	0.390612			0.2 mol / L	0.168346			0.2 mol / L	5.6947			0.2 mol / L	0.100501
0.2 mol / L	0.00404359	-0.213819		0.2 mol / L	0.0114842	-0.0460303		0.2 mol / L	2.12394	4.50205		0.2 mol / L	-0.031715	-0.00709767
0.2 mol / L	-0.203744	-0.227903		0.2 mol / L	0.137764	0.133567		0.2 mol / L	9.6031	10.3922		0.2 mol / L	0.0216667	-0.0300751
0.2 mol / L	0.184362	0.249166		0.2 mol / L	0.143243	0.169603		0.2 mol / L	9.23212	11.3868		0.2 mol / L	-0.0801879	0.0562863
0.2 mol / L	0.233195	-0.377008		0.2 mol / L	-0.0236892	0.0939348		0.2 mol / L	9.76886	10.9186		0.2 mol / L	0.0461767	-0.0482124
0.2 mol / L	-0.00667663			0.2 mol / L	0.310761			0.2 mol / L	19.4582			0.2 mol / L	0.0217739
0.2 mol / L	0.0444507	0.144493		0.2 mol / L	0.168856	0.402916		0.2 mol / L	-0.088208	14.9367		0.2 mol / L	-0.00130628	0.0224979
0.2 mol / L	0.413919	-0.271024		0.2 mol / L	-0.0443021	0.071954		0.2 mol / L	9.44669	12.5406		0.2 mol / L	-0.00568926	-0.0179991
0.2 mol / L	0.234693	-0.081959		0.2 mol / L	0.118954	0.215121		0.2 mol / L	3.79711	13.6652		0.2 mol / L	-0.0371608	0.0603266
0.2 mol / L	-0.109137	0.0207445		0.2 mol / L	0.0597987	-0.00197568		0.2 mol / L	3.57589	13.3337		0.2 mol / L	-0.0385934	0.0721
0.2 mol / L	0.10103	-0.173523		0.2 mol / L	0.211293	-0.156004		0.2 mol / L	21.0512	-14.5419		0.2 mol / L	0.109479	0.00456373
0.2 mol / L	0.0775101	-0.250073		0.2 mol / L	0.152186	-0.153466		0.2 mol / L	11.1112	6.38506		0.2 mol / L	0.0638633	-0.000552215
0.2 mol / L	0.0449931	-0.376873		0.2 mol / L	-0.214477	-0.266661		0.2 mol / L	-11.6846	-2.60122		0.2 mol / L	-0.0036253	0.063763
0.2 mol / L	0.279248	-0.285392		0.2 mol / L	0.0685884	0.25459		0.2 mol / L	12.5866	10.2989		0.2 mol / L	0.0537628	-0.0483271
0.2 mol / L	-0.0682496	0.651287		0.2 mol / L	0.255709	0.130863		0.2 mol / L	11.3896	15.6591		0.2 mol / L	0.0176264	0.0256722
0.2 mol / L	-0.118782	-0.156224		0.2 mol / L	0.178674	-0.0929426		0.2 mol / L	10.977	14.282		0.2 mol / L	-0.0376299	0.0283311
0.2 mol / L	-0.182335	0.234011		0.2 mol / L	0.130626	0.0512551		0.2 mol / L	9.70345	8.13158		0.2 mol / L	0.041004	0.00188327
0.2 mol / L	0.230014	0.108017		0.2 mol / L	0.0666576	0.195524		0.2 mol / L	16.0056	13.2537		0.2 mol / L	0.0494026	-0.00256517
0.2 mol / L	0.0203854	-0.308923		0.2 mol / L	-0.00756068	0.0903072		0.2 mol / L	7.83747	5.92931		0.2 mol / L	0.00787624	0.0597365
0.2 mol / L	0.0950566	0.621069		0.2 mol / L	0.333212	0.201689		0.2 mol / L	8.44156	12.3875		0.2 mol / L	-0.0230532	0.014063
0.2 mol / L	0.127069	-0.160371		0.2 mol / L	-0.0693042	0.264213		0.2 mol / L	7.49793	13.1448		0.2 mol / L	0.0534341	0.022447
0.2 mol / L	0.273818	-0.0453683		0.2 mol / L	0.1571	0.219215		0.2 mol / L	8.87199	8.21602		0.2 mol / L	0.00568143	0.0314316
0.2 mol / L	0.220155	0.452168		0.2 mol / L	0.13025	0.271568		0.2 mol / L	10.6025	6.0005		0.2 mol / L	-0.0226496	0.0486631
0.2 mol / L	0.30073	0.0735663		0.2 mol / L	0.145965	0.0368283		0.2 mol / L	9.61712	12.6312		0.2 mol / L	0.0193954	0.0654169
0.2 mol / L	0.204499	0.21889		0.2 mol / L	0.0987674	0.23418		0.2 mol / L	9.19833	9.44901		0.2 mol / L	-0.0390793	0.00469716
0.6 mol / L	0.364274	0.00999316		0.6 mol / L	0.245222	0.196351		0.6 mol / L	5.57824	5.85809		0.6 mol / L	-0.0448404	0.114876
0.6 mol / L	-0.0408486	0.420104		0.6 mol / L	0.05503	0.194995		0.6 mol / L	7.35494	8.53909		0.6 mol / L	-0.0337124	-0.0537352
0.6 mol / L	0.197269	-0.106011		0.6 mol / L	0.272038	-0.326712		0.6 mol / L	15.2986	9.1605		0.6 mol / L	-0.0463108	0.00725802
0.6 mol / L	0.302556	-0.106675		0.6 mol / L	0.167277	0.230282		0.6 mol / L	15.6637	5.83167		0.6 mol / L	-0.0354207	-0.0800659
0.6 mol / L	0.161189	0.174511		0.6 mol / L	0.196575	0.261647		0.6 mol / L	26.279	12.2261		0.6 mol / L	0.0163733	-0.0505025
0.6 mol / L	-0.125	-0.151652		0.6 mol / L	0.137737	0.0685289		0.6 mol / L	13.729	3.59456		0.6 mol / L	0.0455332	-0.0120095
0.6 mol / L	0.567929	-0.435991		0.6 mol / L	0.180461	0.0989129		0.6 mol / L	10.9412	8.43816		0.6 mol / L	0.103891	0.0678402
0.6 mol / L	0.0409094	0.0394504		0.6 mol / L	0.114134	0.152357		0.6 mol / L	12.6054	11.8251		0.6 mol / L	0.103861	-0.0805599
0.6 mol / L	0.459202	0.00552916		0.6 mol / L	0.157114	0.0812768		0.6 mol / L	2.86855	9.25278		0.6 mol / L	0.0503149	0.0963144
0.6 mol / L	0.00487008	-0.058176		0.6 mol / L	0.0500424	0.302947		0.6 mol / L	8.76319	17.241		0.6 mol / L	-0.0169073	0.0372391
0.6 mol / L	0.613391	-0.00623366		0.6 mol / L	0.423015	0.0699881		0.6 mol / L	17.5496	-0.202277		0.6 mol / L	-0.0315826	0.0244125
0.6 mol / L	-0.145608	-0.252471		0.6 mol / L	0.215623	0.156532		0.6 mol / L	11.2907	10.7261		0.6 mol / L	0.0359808	-0.00849189
0.6 mol / L	0.194916	0.493785		0.6 mol / L	0.112959	-0.044387		0.6 mol / L	14.4943	11.0982		0.6 mol / L	-0.0160758	0.00637227
0.6 mol / L	0.321205	-0.0150175		0.6 mol / L	0.347643	0.055292		0.6 mol / L	16.196	16.6969		0.6 mol / L	-0.0208033	-0.0029622
0.6 mol / L	0.493412	0.272704		0.6 mol / L	0.313016	0.223922		0.6 mol / L	21.4998	12.0714		0.6 mol / L	-0.0212396	-0.0713215
0.6 mol / L	-0.0868047	0.276491		0.6 mol / L	0.0483827	0.263375		0.6 mol / L	12.1318	24.6259		0.6 mol / L	0.0241807	-0.00774964
0.6 mol / L	0.703829	0.124306		0.6 mol / L	0.223938	0.244118		0.6 mol / L	14.0666	8.85479		0.6 mol / L	-0.012584	0.0722245
0.6 mol / L	0.163919	0.178123		0.6 mol / L	0.346603	0.116954		0.6 mol / L	22.6218	20.2414		0.6 mol / L	0.0265818	0.0104913
0.6 mol / L	0.18195	-0.190355		0.6 mol / L	0.240213	-0.107384		0.6 mol / L	9.76203	1.72801		0.6 mol / L	-0.0157978	-0.0402613
0.6 mol / L	0.440206	-0.0439345		0.6 mol / L	0.272082	0.150858		0.6 mol / L	21.5205	4.31197		0.6 mol / L	0.00219616	0.0175054
0.6 mol / L	0.478893	-0.305534		0.6 mol / L	0.11547	0.232643		0.6 mol / L	20.1166	9.80499		0.6 mol / L	-0.0075989	-0.0238115
0.6 mol / L	0.269933	-0.272906		0.6 mol / L	0.306416	-0.129409		0.6 mol / L	20.7587	2.09895		0.6 mol / L	0.0183273	0.00557751
0.6 mol / L	0.192974	0.0103173		0.6 mol / L	0.27283	0.0869738		0.6 mol / L	20.7737	11.1301		0.6 mol / L	0.00891045	0.0107705
0.6 mol / L	0.449734	-0.100168		0.6 mol / L	0.168006	0.0605619		0.6 mol / L	12.8779	12.7408		0.6 mol / L	0.0177082	-0.0501968
0.6 mol / L	0.572573	0.252371		0.6 mol / L	0.259213	0.0362896		0.6 mol / L	19.2976	12.7677		0.6 mol / L	-0.0443795	-0.0169673
0.6 mol / L	0.243741	-0.32412		0.6 mol / L	0.396052	0.0832048		0.6 mol / L	22.9089	11.8633		0.6 mol / L	-0.0835938	-0.00724461
0.6 mol / L	0.38427	0.342912		0.6 mol / L	0.271761	0.00733448		0.6 mol / L	16.3772	16.282		0.6 mol / L	-0.00187397	0.0942103
0.6 mol / L	0.0102583	-0.120947		0.6 mol / L	0.280988	0.204095		0.6 mol / L	9.06417	13.3597		0.6 mol / L	0.0211049	-0.0125139
0.6 mol / L	0.211917	0.085893		0.6 mol / L	0.0911381	0.0595073		0.6 mol / L	10.2606	13.2122		0.6 mol / L	0.0757663	0.121313
0.6 mol / L	0.255332	-0.275013		0.6 mol / L	0.242075	0.176256		0.6 mol / L	19.9804	13.5928		0.6 mol / L	0.0678373	0.0439669
0.6 mol / L	0.337689	0.234382		0.6 mol / L	0.243512	0.127468		0.6 mol / L	19.7151	12.867		0.6 mol / L	0.154916	0.000235295
0.6 mol / L	0.149092	-0.128746		0.6 mol / L	0.142406	0.0870047		0.6 mol / L	7.05783	12.7043		0.6 mol / L	-0.0153138	-0.046062
0.6 mol / L		0.0820038		0.6 mol / L		-0.0047013		0.6 mol / L		2.49328		0.6 mol / L		-0.0768442
0.6 mol / L	0.187689	-0.188183		0.6 mol / L	-0.0167794	0.0613926		0.6 mol / L	10.5057	3.20173		0.6 mol / L	-0.0298299	-0.141455
0.6 mol / L	0.127454	0.239296		0.6 mol / L	0.10426	0.204839		0.6 mol / L	11.813	9.92057		0.6 mol / L	0.00726321	0.0144703
0.6 mol / L	0.237263	0.061075		0.6 mol / L	0.115886	-0.0730557		0.6 mol / L	10.9257	13.9112		0.6 mol / L	0.157855	0.0020062
0.6 mol / L	-0.0902549	-0.276615		0.6 mol / L	0.253974	0.0786629		0.6 mol / L	13.7153	6.47077		0.6 mol / L	0.0604407	0.0495316
0.6 mol / L		-0.102342		0.6 mol / L		0.170364		0.6 mol / L		17.5601		0.6 mol / L		-0.00360163
0.6 mol / L	0.0689655	0.246677		0.6 mol / L	0.0894576	-0.394977		0.6 mol / L	6.02339	-2.47808		0.6 mol / L	0.0252624	0.0223832
0.6 mol / L	0.248445	-0.273303		0.6 mol / L	0.156352	-0.0577189		0.6 mol / L	13.499	6.05948		0.6 mol / L	-0.0603538	0.0693289
0.6 mol / L	0.141718	-0.168001		0.6 mol / L	-0.0266679	-0.0620824		0.6 mol / L	5.41048	4.25506		0.6 mol / L	0.017143	0.00965329
0.6 mol / L	0.56629	-0.0705083		0.6 mol / L	0.280532	0.0180001		0.6 mol / L	25.8869	3.69719		0.6 mol / L	0.0274329	0.00809802
0.6 mol / L	0.256045	0.0501642		0.6 mol / L	0.0847055	0.0899423		0.6 mol / L	5.50055	11.938		0.6 mol / L	0.0173001	-0.018322
0.6 mol / L	-0.117476	-0.187196		0.6 mol / L	0.23972	-0.000592706		0.6 mol / L	21.5622	12.4636		0.6 mol / L	0.0271813	0.0542935
0.6 mol / L	0.499056	0.110449		0.6 mol / L	0.168151	0.201456		0.6 mol / L	34.3581	9.37704		0.6 mol / L	0.00804619	-0.0665045
0.6 mol / L	-0.138976	0.406515		0.6 mol / L	0.271353	0.000522332		0.6 mol / L	13.4477	13.6612		0.6 mol / L	0.022669	-0.00482866
0.6 mol / L	0.402635	0.331795		0.6 mol / L	0.0924955	0.198154		0.6 mol / L	10.9411	9.01985		0.6 mol / L	0.0546323	-0.150943
0.6 mol / L	0.19524	-0.0559063		0.6 mol / L	0.113208	0.0531086		0.6 mol / L	15.2004	10.5043		0.6 mol / L	-0.0485511	0.00382708
0.6 mol / L	0.26533	-0.0338346		0.6 mol / L	0.429568	-0.0453788		0.6 mol / L	39.4495	10.2599		0.6 mol / L	0.00947834	-0.0690911
0.6 mol / L	0.0292416	0.284695		0.6 mol / L	0.363931	0.11417		0.6 mol / L	13.8134	12.2627		0.6 mol / L	0.0213694	0.0377298
0.6 mol / L	0.258827	0.463479		0.6 mol / L	0.221107	0.252055		0.6 mol / L	25.0685	14.4518		0.6 mol / L	0.0792872	-0.169044
0.6 mol / L	0.295718	0.0400314		0.6 mol / L	0.330654	-0.0699103		0.6 mol / L	14.2261	10.1025		0.6 mol / L	-0.0306582	0.0784627
0.6 mol / L	0.397253	0.0827535		0.6 mol / L	0.169141	-0.0625539		0.6 mol / L	15.2578	5.35345		0.6 mol / L	-0.0110578	-0.0297669
0.6 mol / L	0.724305	-0.311146		0.6 mol / L	0.205319	0.0531045		0.6 mol / L	14.0058	9.15057		0.6 mol / L	0.0136324	-0.00822791
0.6 mol / L	0.440134	-0.150193		0.6 mol / L	0.103818	0.0200281		0.6 mol / L	13.2946	11.5404		0.6 mol / L	0.120609	-0.0313156
0.6 mol / L	0.772094	0.219211		0.6 mol / L	0.18542	0.0190119		0.6 mol / L	21.6799	7.44355		0.6 mol / L	0.038872	-0.0101582
0.6 mol / L	0.0144605	-0.0442201		0.6 mol / L	0.316195	-0.0432582		0.6 mol / L	16.5812	7.37464		0.6 mol / L	0.0818247	0.0658431
2.0 mol / L	0.293439	-0.415766		2.0 mol / L	0.183518	0.0791524		2.0 mol / L	14.3854	6.84231		2.0 mol / L	0.040191	-0.114778
2.0 mol / L	0.323409	0.00953192		2.0 mol / L	0.0969852	0.271886		2.0 mol / L	14.4765	18.6017		2.0 mol / L	0.0249172	0.0599168
2.0 mol / L	0.60862	-0.356846		2.0 mol / L	0.251254	0.0192523		2.0 mol / L	14.5199	-1.94228		2.0 mol / L	-0.0200286	0.0264223
2.0 mol / L	0.146766	-0.107779		2.0 mol / L	0.343698	0.187917		2.0 mol / L	23.0685	10.4622		2.0 mol / L	-0.0354799	-0.177175
2.0 mol / L	0.349254	0.503844		2.0 mol / L	0.360613	0.161437		2.0 mol / L	22.8617	13.7328		2.0 mol / L	0.0718547	-0.0166842
2.0 mol / L	0.424267	0.00649727		2.0 mol / L	0.418628	0.157238		2.0 mol / L	21.2756	14.4141		2.0 mol / L	0.0130153	-0.0434418
2.0 mol / L	0.359885	-0.461253		2.0 mol / L	0.417639	-0.160353		2.0 mol / L	21.8568	-2.44829		2.0 mol / L	-0.0218685	-0.0670593
2.0 mol / L	0.409191	0.033366		2.0 mol / L	0.408397	0.0170651		2.0 mol / L	15.5296	5.90047		2.0 mol / L	-0.00289138	0.0177177
2.0 mol / L	0.178178	-0.287719		2.0 mol / L	0.269565	0.116908		2.0 mol / L	11.928	9.58743		2.0 mol / L	-0.00740577	0.0674723
2.0 mol / L	0.331449	-0.0455726		2.0 mol / L	0.207022	-0.0726584		2.0 mol / L	21.1195	10.2298		2.0 mol / L	0.00782961	-0.0171041
2.0 mol / L	0.19177	0.286559		2.0 mol / L	0.378281	0.170485		2.0 mol / L	24.5129	11.2579		2.0 mol / L	0.0292127	0.0114996
2.0 mol / L	0.436804	-0.150814		2.0 mol / L	0.459712	-0.144064		2.0 mol / L	18.6487	10.6692		2.0 mol / L	0.0801569	0.0682512
2.0 mol / L	0.253263	-0.193087		2.0 mol / L	0.236959	0.0336511		2.0 mol / L	14.859	8.73392		2.0 mol / L	0.0275616	0.0943571
2.0 mol / L	0.429167	0.0276904		2.0 mol / L	0.274663	0.176987		2.0 mol / L	17.8932	15.0213		2.0 mol / L	0.0861162	0.0342369
2.0 mol / L	0.416923	-0.448314		2.0 mol / L	0.258479	-0.116139		2.0 mol / L	20.6056	7.95068		2.0 mol / L	0.0546927	0.0022824
2.0 mol / L	0.486606	0.082681		2.0 mol / L	0.264709	0.218344		2.0 mol / L	18.3219	10.2534		2.0 mol / L	-0.0517909	0.0503255
2.0 mol / L	0.646575	-0.188112		2.0 mol / L	0.386112	0.026471		2.0 mol / L	22.2882	7.6091		2.0 mol / L	-0.00732313	0.0267626
2.0 mol / L	0.493363	-0.27323		2.0 mol / L	0.448007	0.264716		2.0 mol / L	18.881	16.9825		2.0 mol / L	0.0300829	0.0173113
2.0 mol / L	0.122505	-0.23087		2.0 mol / L	0.188816	-0.0346396		2.0 mol / L	12.5185	0.5779		2.0 mol / L	0.020669	0.0442276
2.0 mol / L	0.494496	-0.175655		2.0 mol / L	0.306067	0.281712		2.0 mol / L	16.2039	10.2987		2.0 mol / L	-0.00851339	-0.00617695
2.0 mol / L	0.523761	-0.232621		2.0 mol / L	0.174681	-0.0892711		2.0 mol / L	14.1734	7.84283		2.0 mol / L	-0.0112793	0.0267698
2.0 mol / L	0.10724	-0.1865		2.0 mol / L	0.277042	-0.0478954		2.0 mol / L	16.1192	7.69976		2.0 mol / L	0.062777	0.0595162
2.0 mol / L	0.248908	0.095757		2.0 mol / L	0.37074	0.0973067		2.0 mol / L	24.6978	12.4844		2.0 mol / L	0.0358895	-0.0172792
2.0 mol / L	0.303968	0.0518373		2.0 mol / L	0.21423	0.228174		2.0 mol / L	12.2725	22.7684		2.0 mol / L	0.03255	0.0122429
2.0 mol / L	0.360381	-0.593594		2.0 mol / L	0.275353	0.0773383		2.0 mol / L	23.5297	9.999		2.0 mol / L	0.0300328	-0.10255
2.0 mol / L	0.396003	0.014854		2.0 mol / L	0.399687	0.047024		2.0 mol / L	27.2982	8.4347		2.0 mol / L	0.0539473	-0.0261669
2.0 mol / L	-0.127812	-0.147674		2.0 mol / L	-0.111537	0.0837802		2.0 mol / L	10.9426	13.2342		2.0 mol / L	0.103981	0.0176353
2.0 mol / L	0.369183	0.338069		2.0 mol / L	0.136525	0.119482		2.0 mol / L	13.5028	8.95253		2.0 mol / L	-0.0267152	0.026452
2.0 mol / L	0.23601	0.184165		2.0 mol / L	0.151932	0.109657		2.0 mol / L	13.3623	3.92789		2.0 mol / L	0.034811	0.0924557
2.0 mol / L	0.64709	0.0265091		2.0 mol / L	0.147117	0.0246323		2.0 mol / L	16.7889	2.89686		2.0 mol / L	0.0506699	-0.0616137
2.0 mol / L	0.305381	-0.231113		2.0 mol / L	0.221211	0.0925517		2.0 mol / L	19.1807	13.4004		2.0 mol / L	-0.0101944	-0.0615345
2.0 mol / L	0.264166	-0.10948		2.0 mol / L	0.444429	0.0169109		2.0 mol / L	16.6077	5.67932		2.0 mol / L	0.00496438	0.0371901
2.0 mol / L	0.403815	-0.0174925		2.0 mol / L	0.183724	0.184971		2.0 mol / L	16.2968	14.6905		2.0 mol / L	-0.0118057	0.114533
2.0 mol / L	0.440145	0.120062		2.0 mol / L	0.00946141	0.0175316		2.0 mol / L	12.3021	10.4616		2.0 mol / L	-0.0124279	-0.0347347
2.0 mol / L	0.0711088	-0.0362683		2.0 mol / L	0.0867784	0.124054		2.0 mol / L	4.61548	4.91891		2.0 mol / L	-0.0250984	-0.0328231
2.0 mol / L	0.604064	-0.107079		2.0 mol / L	0.302135	-0.0907617		2.0 mol / L	23.5792	7.69055		2.0 mol / L	0.019475	-0.0798574
2.0 mol / L	0.351946	-0.040075		2.0 mol / L	0.151102	-0.0277408		2.0 mol / L	8.1589	7.72154		2.0 mol / L	-0.00261696	0.00374806
2.0 mol / L	0.687226	0.044881		2.0 mol / L	0.296506	-0.0538175		2.0 mol / L	22.6459	8.5726		2.0 mol / L	0.0649666	-0.0151045
2.0 mol / L	0.433962	0.176052		2.0 mol / L	0.259028	0.235948		2.0 mol / L	17.0106	15.666		2.0 mol / L	0.00782049	0.00163705
2.0 mol / L	0.449249	-0.316816		2.0 mol / L	0.502825	-0.106853		2.0 mol / L	22.0224	2.56053		2.0 mol / L	-0.013436	-0.0194555
2.0 mol / L	0.404852	-1		2.0 mol / L	0.466421	1		2.0 mol / L	25.665	53.1581		2.0 mol / L	0.107648	-0.137107
2.0 mol / L	0.17322	-0.534915		2.0 mol / L	0.224531	-0.0806631		2.0 mol / L	18.2689	7.70986		2.0 mol / L	0.0432315	-0.0274623
2.0 mol / L	0.265358	-0.267432		2.0 mol / L	0.381724	0.0461669		2.0 mol / L	18.7405	5.7526		2.0 mol / L	-0.00377579	0.0774803
2.0 mol / L	0.362776	-0.421917		2.0 mol / L	0.241921	-0.147184		2.0 mol / L	20.0973	6.32046		2.0 mol / L	0.0497276	-0.00465444
2.0 mol / L	0.180903	-0.357477		2.0 mol / L	0.135005	0.0587168		2.0 mol / L	15.061	3.77331		2.0 mol / L	-0.0255041	-0.0215611
2.0 mol / L	0.0975547	-0.0262499		2.0 mol / L	0.259299	-0.0118513		2.0 mol / L	17.8431	9.09749		2.0 mol / L	-0.0332863	-0.0453942
2.0 mol / L	0.49089	-0.333607		2.0 mol / L	0.361453	0.129826		2.0 mol / L	21.8023	6.38284		2.0 mol / L	0.0399417	0.00704011
2.0 mol / L	0.391429	-0.230951		2.0 mol / L	0.302522	-0.0428649		2.0 mol / L	23.019	5.5114		2.0 mol / L	-0.0172288	-0.00714246
2.0 mol / L	0.166403	-0.0253399		2.0 mol / L	0.227146	0.150614		2.0 mol / L	20.4115	11.562		2.0 mol / L	0.123552	0.0125912
2.0 mol / L	0.00878859	0.527205		2.0 mol / L	0.042839	0.0597974		2.0 mol / L	18.5231	14.8023		2.0 mol / L	0.0351339	-0.0431646
2.0 mol / L	0.0231918	-0.200618		2.0 mol / L	0.209114	0.192518		2.0 mol / L	12.0465	8.35111		2.0 mol / L	-0.0120562	0.0172578
2.0 mol / L	0.379715	-0.166468		2.0 mol / L	0.0205071	-0.213701		2.0 mol / L	16.8871	7.94188		2.0 mol / L	0.0461218	-0.0204369
2.0 mol / L	0.70342	-0.0293774		2.0 mol / L	0.107273	0.0755911		2.0 mol / L	18.7596	15.7432		2.0 mol / L	0.0208198	-0.0150028
2.0 mol / L	-0.107536	-0.0882061		2.0 mol / L	0.0529872	0.101875		2.0 mol / L	9.03429	3.05683		2.0 mol / L	-0.006589	0.0247092
2.0 mol / L	0.202886	0.0249008		2.0 mol / L	0.131935	0.0515956		2.0 mol / L	7.45205	7.32603		2.0 mol / L	0.026541	0.000144074
2.0 mol / L	-0.0372767	-0.13915		2.0 mol / L	0.0016811	0.131343		2.0 mol / L	5.49008	3.29428		2.0 mol / L	0.04513	0.0706945

## Sheet: S2 Fig
S2 Fig
This data is also used in Fig 3C
S2 Fig A				S2 Fig B				S2 Fig C				S2 Fig D
Odour dilution	Pref Paired	Pref Unpaired		Odour dilution	HC rate-modulation Paired	HC rate-modulation Unpaired		Odour dilution	Reorientation per HC Paired	Reorientation per HC Unpaired		Odour dilution	Run speed-modulation Paired	Run speed-modulation Unpaired
1:2000	0.133958	-0.062327		1:2000	0.152932	-0.0423284		1:2000	15.3586	6.4201		1:2000	0.112467	0.185231
1:2000	-0.250518	-0.0305975		1:2000	0.150397	0.017418		1:2000	8.88077	-2.98156		1:2000	-0.0194451	-0.0885617
1:2000	0.216283	0.0995456		1:2000	0.0371663	0.0771377		1:2000	0.227878	3.59327		1:2000	-0.025674	0.0407718
1:2000	0.0440015	-0.220253		1:2000	0.0523034	0.14761		1:2000	3.48848	8.8508		1:2000	0.0762818	0.0205605
1:2000	-0.101481	-0.120165		1:2000	0.136225	0.195134		1:2000	3.75589	4.85197		1:2000	0.029641	0.0403265
1:2000	-0.286952	0.0905279		1:2000	0.0100943	0.344317		1:2000	0.544021	12.8296		1:2000	0.045002	0.00257259
1:2000	0.2249	-0.182652		1:2000	0.260942	0.396252		1:2000	13.8942	-3.21914		1:2000	0.0466781	-0.157162
1:2000	0.362146	0.36074		1:2000	0.128767	-0.121623		1:2000	11.0908	-4.92626		1:2000	0.0494206	0.03094
1:2000	0.154565	0.125948		1:2000	0.133433	-0.0861857		1:2000	2.66382	17.6272		1:2000	0.0176947	-0.0512497
1:2000	-0.0813066	0.20123		1:2000	-0.32015	-0.117479		1:2000	6.11022	6.55134		1:2000	0.0480781	0.0685247
1:2000	-0.0940763	-0.191108		1:2000	-0.240202	-0.116201		1:2000	-1.59466	0.765456		1:2000	0.0851235	0.0355307
1:2000	-0.00618047	0.337972		1:2000	0.0118646	0.0969186		1:2000	3.84613	6.92165		1:2000	-0.0239351	-0.119339
1:2000	-0.118121	-0.0169348		1:2000	0.397186	0.250813		1:2000	14.0197	12.8025		1:2000	0.0594695	0.0247322
1:2000	0.181482	0.3264		1:2000	0.219189	0.231365		1:2000	16.4288	9.4375		1:2000	0.0544769	-0.0407674
1:2000	-0.332605	0.0542141		1:2000	0.0839094	0.266453		1:2000	3.97681	11.3845		1:2000	-0.0819894	0.0214017
1:2000	-0.0476789	0.0930578		1:2000	0.0283181	-0.0677317		1:2000	2.64849	3.54466		1:2000	-0.0497765	0.08447
1:2000	-0.182391	-0.260452		1:2000	0.0296324	-0.0932525		1:2000	4.457	0.114217		1:2000	0.0694185	0.03951
1:2000	0.270265	0.303208		1:2000	0.390649	-0.234636		1:2000	15.6612	19.1151		1:2000	0.0571278	0.119926
1:2000	-0.230122	0.133997		1:2000	-0.0815833	0.0125291		1:2000	7.66721	1.71188		1:2000	-0.0424935	-0.0779979
1:2000	0.0990292	-0.217709		1:2000	0.0697666	0.0875049		1:2000	2.53006	5.84177		1:2000	-0.00363551	0.025582
1:2000	-0.215785	0.335095		1:2000	0.0357767	0.0350458		1:2000	-11.2817	4.94191		1:2000	-0.0710482	0.00359155
1:2000	0.0838481	0.616795		1:2000	-0.113375	-0.126288		1:2000	10.3084	11.1609		1:2000	0.122133	0.00204538
1:2000	-0.410212	-0.40545		1:2000	-0.0123232	0.0479921		1:2000	3.10924	5.74324		1:2000	-0.0352362	-0.0618332
1:2000	-0.121419	-0.166695		1:2000	0.0848595	0.0492087		1:2000	4.38223	-5.1639		1:2000	0.00271872	-0.133734
1:2000	0.546597	-0.0790486		1:2000	-0.0126136	0.170341		1:2000	6.23863	17.4936		1:2000	-0.0377831	-0.0115792
1:2000	-0.0466084	-0.257139		1:2000	0.0295092	-0.036537		1:2000	5.2466	11.9171		1:2000	-0.0104386	0.0526576
1:2000	0.114781	0.108298		1:2000	0.0387151	-0.0350278		1:2000	-4.09887	5.98198		1:2000	-0.0693202	0.056636
1:2000	-0.0239367	0.324433		1:2000	0.0693811	0.201389		1:2000	7.17924	9.95327		1:2000	0.0191402	0.00308794
1:2000	0.193758	0.034743		1:2000	0.0577745	-0.00624861		1:2000	5.23864	0.134777		1:2000	0.0292441	-0.00904155
1:2000	0.338975	0.0413303		1:2000	0.304864	0.20333		1:2000	15.0204	12.9374		1:2000	-0.0642482	0.0175985
1:2000	0.169408	-0.152495		1:2000	0.167803	-0.00469311		1:2000	8.32296	11.0589		1:2000	-0.044104	0.019645
1:2000	-0.0850858	-0.38962		1:2000	0.204	0.012862		1:2000	13.0341	2.59823		1:2000	0.159747	0.0218102
1:2000	0.371241	-0.00519221		1:2000	0.324443	0.126705		1:2000	15.2763	12.2864		1:2000	0.0702111	0.037651
1:2000	-0.0983077	0.166505		1:2000	0.262416	0.31768		1:2000	7.38417	18.1574		1:2000	0.131206	-0.0136297
1:2000	-0.0152872	0.151816		1:2000	0.259787	-0.0771875		1:2000	14.4897	14.5672		1:2000	0.0657852	0.297575
1:2000	-0.425773	0.0456808		1:2000	0.00809505	0.158975		1:2000	0.606937	3.67247		1:2000	0.048839	0.117355
1:2000	0.142208	0.143064		1:2000	0.224244	0.119392		1:2000	11.3598	2.86713		1:2000	0.0350253	0.0446497
1:2000	-0.129153	0.177454		1:2000	0.114794	-0.0553835		1:2000	23.4077	5.12147		1:2000	0.146897	-0.0875468
1:2000	-0.329751	-0.129874		1:2000	0.107416	-0.151611		1:2000	-0.00437399	4.5522		1:2000	-0.00846009	0.0446443
1:2000	0.247001	0.248797		1:2000	0.00435995	0.123646		1:2000	6.14742	19.7896		1:2000	0.0330061	0.0139703
1:2000		0.419964		1:2000		-0.11747		1:2000		7.14174		1:2000		0.0970669
1:2000	-0.190898	0.256963		1:2000	-0.168868	-0.0310628		1:2000	19.292	0.049749		1:2000	-0.075674	-0.0444024
1:2000	-0.317346	0.467837		1:2000	0.0498513	0.0751061		1:2000	0.225931	-0.134201		1:2000	-0.0428675	-0.0382255
1:2000	0.347225	0.28173		1:2000	0.241405	0.250939		1:2000	17.6345	10.3136		1:2000	-0.0463502	-0.143019
1:2000	-0.0103981	0.302138		1:2000	0.0599534	0.117752		1:2000	9.16274	-6.0083		1:2000	-0.0123597	-0.00242507
1:2000	0.0124716	0.0600586		1:2000	0.19643	0.0476268		1:2000	9.33181	0.590615		1:2000	-0.0603826	-0.0287082
1:2000	0.136178	0.177556		1:2000	0.295592	-0.0262149		1:2000	18.858	8.18935		1:2000	0.0131907	0.00436203
1:2000	0.384426	0.136109		1:2000	0.537601	0.0676554		1:2000	29.3037	9.90563		1:2000	0.0227365	-0.0113849
1:2000	0.410869	-0.075734		1:2000	0.270666	0.115606		1:2000	16.8837	9.91292		1:2000	0.00935782	-0.0586685
1:2000	0.277781	-0.298511		1:2000	0.207811	-0.029233		1:2000	10.887	2.07113		1:2000	-0.0024766	0.000679379
1:2000	0.494654	-0.228029		1:2000	0.260989	0.120955		1:2000	13.9578	6.9261		1:2000	0.0122666	-0.0158637
1:2000	-0.0143221	0.0881405		1:2000	0.238704	0.0585447		1:2000	13.9412	3.93093		1:2000	-0.0667395	-0.0303528
1:2000	0.390478			1:2000	0.161561			1:2000	24.4603			1:2000	0.0213315
1:2000	0.0810448	-0.315742		1:2000	0.225922	0.115335		1:2000	5.96771	6.71544		1:2000	-0.0192438	0.0367398
1:2000	-0.303636	-0.116414		1:2000	-0.119657	0.116802		1:2000	-2.51197	6.54092		1:2000	0.0207645	0.0325973
1:2000	0.191775	-0.191463		1:2000	0.00826001	0.0536222		1:2000	7.60634	7.62142		1:2000	0.0292393	0.0149093
1:2000	0.316791	-0.386439		1:2000	0.186349	-0.0254931		1:2000	7.72304	1.75079		1:2000	0.021407	-0.0560237
1:2000	-0.0740041	-0.235294		1:2000	0.155907	-0.0272227		1:2000	11.1419	5.27846		1:2000	-0.0111346	-0.0151901
1:2000	0.180132	-0.159237		1:2000	0.159638	-0.0113279		1:2000	13.4442	10.4408		1:2000	-0.0117001	0.0116238
1:200	0.304305	-0.200389		1:200	0.218902	0.0870819		1:200	16.9471	6.65756		1:200	0.0187123	0.111085
1:200	0.223852	-0.212953		1:200	0.193713	0.159454		1:200	18.4279	8.25003		1:200	0.220693	-0.00659252
1:200	0.524142	-0.151963		1:200	0.0691391	0.123002		1:200	12.6421	4.5652		1:200	-0.00863618	0.0195721
1:200	-0.0959446	-0.119832		1:200	0.110553	0.10303		1:200	3.93438	10.142		1:200	0.0190877	0.0422641
1:200	0.254707	-0.077952		1:200	0.1913	0.182498		1:200	10.9045	6.93548		1:200	0.103593	0.0483115
1:200	0.458274	-0.00441609		1:200	0.117153	0.19335		1:200	1.43175	14.5708		1:200	0.0712411	0.0518364
1:200	0.579479	0.205995		1:200	-0.00131723	0.149958		1:200	17.9377	3.73045		1:200	-0.00459775	-0.0639576
1:200	0.119667	0.463632		1:200	0.033804	0.511181		1:200	10.9055	18.8096		1:200	-0.0171724	-0.0361436
1:200	-0.259836	0.304375		1:200	0.109844	0.050718		1:200	6.00908	8.82081		1:200	0.0238375	0.0642646
1:200	-0.018625	-0.0811338		1:200	0.259067	0.0977278		1:200	9.6022	8.30511		1:200	0.0276942	-0.18888
1:200	0.0607177	0.112765		1:200	0.0584598	0.0276098		1:200	1.49262	3.80815		1:200	0.0852614	0.0511921
1:200	0.289635	-0.255496		1:200	0.295476	-0.079181		1:200	13.4207	5.10092		1:200	-0.051552	0.1024
1:200	0.149184	-0.243875		1:200	0.291753	0.157598		1:200	17.5523	7.69702		1:200	-0.104914	-0.0825635
1:200	0.453149	-0.175322		1:200	0.309553	0.129118		1:200	13.7132	10.2137		1:200	-0.0336142	0.037522
1:200	0.153747	-0.0172733		1:200	0.0806884	-0.022615		1:200	10.9829	10.5178		1:200	0.00910179	0.0206358
1:200	-0.107822	-0.154663		1:200	0.169992	0.189173		1:200	5.58567	11.1051		1:200	-0.0678266	-0.0280832
1:200	0.0356645	0.00354521		1:200	0.272308	0.420526		1:200	14.3806	14.0344		1:200	0.0412744	0.0563798
1:200	0.387092	0.104374		1:200	0.0508046	0.111979		1:200	11.8792	8.7698		1:200	0.0401184	-0.0789308
1:200	-0.363707	-0.113035		1:200	-0.0644269	-0.0123162		1:200	7.11724	3.14192		1:200	0.0349747	0.00691614
1:200	-0.379212	0.0460285		1:200	0.0899189	-0.0324061		1:200	-0.647522	11.637		1:200	0.0166397	-0.0094359
1:200	0.424741	-0.1154		1:200	0.0502986	0.0530898		1:200	9.99755	-2.41752		1:200	-0.0983437	-0.0638644
1:200	-0.130353	-0.0437641		1:200	-0.0356997	-0.04216		1:200	3.35937	5.83679		1:200	0.073683	-0.036794
1:200	-0.42513	-0.379252		1:200	0.0925841	-0.477669		1:200	3.68907	0.143541		1:200	-0.012229	-0.0863825
1:200	-0.433091	-0.314267		1:200	0.0346905	-0.138023		1:200	0.991587	8.77234		1:200	0.0189503	-0.00702159
1:200	0.0032438	-0.140597		1:200	0.345901	-0.00918734		1:200	17.9561	6.35459		1:200	0.100374	0.0383049
1:200	-0.157977	0.21331		1:200	0.0372762	0.0017913		1:200	0.204765	5.71841		1:200	0.0106131	-0.112273
1:200	0.166151	0.251632		1:200	0.0136442	0.019406		1:200	-1.49048	1.15056		1:200	-0.0223351	0.00142461
1:200	0.434193	-0.0661482		1:200	0.187557	-0.0367313		1:200	10.206	-0.144405		1:200	-0.0279523	-0.0441485
1:200	0.20136	-0.0848104		1:200	0.193999	0.153597		1:200	11.8638	4.14989		1:200	0.0734238	0.0522131
1:200	0.19536	0.0755875		1:200	0.379291	0.100078		1:200	21.4765	6.551		1:200	-0.0110861	0.0378515
1:200	-0.000255715	-0.0802584		1:200	0.181784	0.0848762		1:200	22.6096	9.719		1:200	-0.0219777	-0.0264889
1:200	-0.172991	-0.0887116		1:200	0.404357	0.274541		1:200	11.9136	4.63115		1:200	-0.054492	0.0144776
1:200	0.238668	-0.191951		1:200	0.245448	0.160842		1:200	18.1026	1.0501		1:200	-0.0357121	0.0215704
1:200	0.479059	-0.149072		1:200	-0.010878	-0.0789337		1:200	18.9752	5.20991		1:200	-0.0125342	-0.0117259
1:200	-0.158008	-0.371155		1:200	0.244142	-0.082664		1:200	8.87647	5.2221		1:200	0.146739	-0.00663097
1:200	0.115194	-0.0457305		1:200	0.126247	0.262182		1:200	9.13832	11.3671		1:200	-0.0280825	0.00584338
1:200	0.100934	-0.410091		1:200	-0.10579	-0.11652		1:200	16.7341	2.12002		1:200	0.0467884	0.013996
1:200	-0.161639	0.172719		1:200	0.502765	0.177494		1:200	18.7387	11.7154		1:200	-0.0307307	-0.0387743
1:200	-0.00594679	-0.215476		1:200	0.316564	0.213175		1:200	17.8055	10.4308		1:200	0.0362205	0.028194
1:200	0.342397	0.665564		1:200	0.122209	0.0577738		1:200	7.06357	14.3454		1:200	-0.250924	-0.0446879
1:200	-0.0224858	-0.136641		1:200	0.215286	-0.22985		1:200	16.0793	0.58562		1:200	-0.108935	0.0239282
1:200	-0.0638028	-0.122003		1:200	0.415703	-0.13936		1:200	25.2093	4.12349		1:200	0.0446761	0.0403418
1:200	-0.0832445	-0.0513406		1:200	-0.151136	0.114763		1:200	-1.25168	10.4163		1:200	0.0964661	0.0167915
1:200	-0.0775866	-0.0924384		1:200	0.114966	-0.0651535		1:200	8.79373	2.47883		1:200	-0.0028368	0.0382694
1:200	0.202431	-0.08839		1:200	0.248082	0.0739136		1:200	12.5146	6.18398		1:200	-0.0842257	-0.00177729
1:200	0.315429	-0.291493		1:200	0.186823	0.0361918		1:200	15.0805	4.35325		1:200	-0.00707408	0.167466
1:200	0.207294	-0.164717		1:200	0.265032	0.0835784		1:200	16.7988	5.61973		1:200	-0.00856502	-0.00888467
1:200	0.259188	-0.279056		1:200	0.55856	0.117289		1:200	40.3533	4.07594		1:200	-0.000993066	0.0128668
1:200	0.421802	-0.00497069		1:200	0.0283069	0.159613		1:200	4.59348	12.1859		1:200	-0.070141	-0.00896805
1:200	0.66931	-0.48876		1:200	0.196564	-0.116123		1:200	14.1245	3.91626		1:200	-0.0233959	-0.0234682
1:200	0.299795	-0.524618		1:200	0.277032	0.00744448		1:200	14.2883	14.1393		1:200	-0.0452124	-0.0033108
1:200	0.136275	-0.345569		1:200	0.133464	-0.0128153		1:200	14.6843	9.39295		1:200	-0.0633811	0.0438762
1:200	0.0948595	-0.108555		1:200	0.188886	0.00784661		1:200	15.4184	8.66505		1:200	0.02192	0.0600972
1:200	0.00560854	-0.267461		1:200	0.162392	0.0242109		1:200	10.9302	1.90274		1:200	0.0128693	-0.00564262
1:200	0.0641457	0.137248		1:200	0.136169	0.0317127		1:200	14.7578	8.16761		1:200	0.0406393	-0.0262267
1:200	0.645133	-0.257886		1:200	0.237665	0.0786464		1:200	15.4395	3.8386		1:200	0.0058587	-0.00403164
1:200	0.459122	-0.334855		1:200	0.180789	0.0562808		1:200	11.6549	3.63		1:200	0.0172025	-0.0347288
1:200	0.0743665	-0.334348		1:200	0.235364	-0.0348093		1:200	15.6057	8.12328		1:200	0.0279601	-0.0291159
1:20	-0.142552	-0.0781734		1:20	0.220886	-0.0493516		1:20	8.64306	-1.60546		1:20	-0.0125003	-0.118187
1:20	0.173638	-0.291529		1:20	0.116176	-0.0646267		1:20	9.33118	3.0958		1:20	0.012311	-0.0158611
1:20	0.311266	-0.0245316		1:20	0.150976	-0.0885899		1:20	10.7965	9.60241		1:20	-0.0384834	-0.0965852
1:20	0.266738	-0.0855528		1:20	0.384138	0.0504129		1:20	18.6886	5.76312		1:20	0.0286678	-0.0681457
1:20	-0.119846	-0.372462		1:20	0.222918	0.0244269		1:20	20.6485	4.47501		1:20	0.0286758	-0.0107383
1:20	0.154089	0.372385		1:20	0.105302	-0.0856312		1:20	8.85033	0.700555		1:20	-0.0341396	0.000841956
1:20		-0.203245		1:20		-0.0104504		1:20		0.568281		1:20		-0.0225922
1:20	0.217495	-0.15016		1:20	0.322059	-0.141755		1:20	15.4778	-6.36679		1:20	0.064069	0.0103994
1:20	-0.187445	-0.0135611		1:20	0.129359	-0.0574933		1:20	14.1097	-3.86986		1:20	0.0444838	0.0296087
1:20	0.112662	0.129181		1:20	0.16479	-0.206085		1:20	12.0813	-9.92917		1:20	-0.0484471	0.0935371
1:20	0.180579	0.181419		1:20	0.0720929	0.231957		1:20	14.6979	7.58874		1:20	0.00118392	-0.0284296
1:20	0.105402	-0.243435		1:20	0.0183852	-0.10033		1:20	14.8671	1.05161		1:20	0.182808	0.0676881
1:20	0.307907	-0.0359017		1:20	0.428913	-0.101429		1:20	18.7519	4.61023		1:20	0.0452709	0.0523647
1:20	0.283374	0.112644		1:20	0.264637	0.0780262		1:20	13.5486	5.03183		1:20	-0.00901924	0.00776885
1:20	0.0999037	-0.109159		1:20	0.0529974	0.0593769		1:20	5.78971	12.5836		1:20	0.0499436	0.00850727
1:20	0.286951	0.0083612		1:20	0.368974	0.0138362		1:20	19.979	-4.0685		1:20	-0.0441942	0.00803857
1:20	0.150783	0.213221		1:20	0.116697	0.105412		1:20	13.829	3.16144		1:20	0.0246291	0.0224172
1:20	0.0346986	-0.276616		1:20	0.184546	-0.196162		1:20	12.5309	-0.969917		1:20	0.0592648	-0.0902843
1:20	0.0611726	-0.0989514		1:20	-0.177988	0.0589213		1:20	8.03323	1.53276		1:20	0.0592396	-0.00450748
1:20	0.103217	0.215477		1:20	0.292057	0.0124222		1:20	17.2855	6.68541		1:20	-0.0243834	0.00693841
1:20	-0.0233183	-0.155965		1:20	-0.0880587	-0.0985051		1:20	2.48865	4.66886		1:20	-0.00908514	-0.00529345
1:20	0.0465886	-0.208424		1:20	0.01136	-0.023452		1:20	-0.797525	11.4704		1:20	-0.0707155	0.0113061
1:20	-0.074621	0.0835154		1:20	-0.006844	0.19989		1:20	-2.66839	8.28462		1:20	0.00323227	-0.0183182
1:20	0.218453	-0.0608457		1:20	0.314867	0.022124		1:20	14.0974	-1.43363		1:20	-0.00626793	0.0378789
1:20	0.58058	-0.0481661		1:20	0.327777	-0.0819869		1:20	9.76423	12.1223		1:20	0.00778828	0.178901
1:20	-0.32892	-0.128569		1:20	0.0166462	-0.137761		1:20	5.30662	-1.90161		1:20	-0.0344677	-0.0536817
1:20	0.358811	-0.0977037		1:20	0.268474	0.152125		1:20	12.8479	11.7697		1:20	0.0402803	0.00736547
1:20	-0.0436214	-0.0821659		1:20	0.249644	0.0686375		1:20	23.1552	-0.620949		1:20	0.117683	-0.0471327
1:20	0.161803	-0.397526		1:20	0.161042	-0.0654984		1:20	12.5293	-4.37938		1:20	0.0103479	-0.0240314
1:20	-0.317982	-0.14486		1:20	-0.018057	0.104847		1:20	11.6173	13.4788		1:20	0.0906612	0.048103
1:20	0.0593111	-0.0339006		1:20	0.276627	0.0922973		1:20	11.742	6.09017		1:20	0.00619162	-0.10947
1:20	0.523948	0.24161		1:20	0.318268	0.0331068		1:20	20.0415	8.24524		1:20	-0.00474041	-0.136411
1:20	0.422431	-0.424776		1:20	0.19193	-0.0476156		1:20	20.0386	5.31587		1:20	0.155697	0.0391988
1:20	0.137737	-0.0441329		1:20	0.114106	0.0805049		1:20	8.73227	16.53		1:20	0.0169285	0.0830706
1:20	0.306947	0.00975413		1:20	0.112255	0.0420097		1:20	5.82101	0.541182		1:20	0.0144695	0.0315082
1:20	0.0735609	0.0293186		1:20	-0.0591289	0.024772		1:20	8.4445	-2.35		1:20	0.0433538	0.0321255
1:20	0.58279	-0.403303		1:20	0.0187442	-0.0155969		1:20	11.8141	6.9912		1:20	0.0810986	0.0449397
1:20		0.14245		1:20		-0.0105241		1:20		9.04169		1:20		0.115553
1:20	-0.0137512	0.293316		1:20	-0.326032	0.0335412		1:20	12.0677	12.941		1:20	0.0816694	-0.0118836
1:20	0.335475	0.165678		1:20	0.0879364	0.181953		1:20	4.77683	5.4609		1:20	-0.0292405	-0.244608
1:20	0.0577087	0.0391912		1:20	0.0253529	-0.0753755		1:20	6.11198	-5.07782		1:20	0.0944593	0.00822408
1:20	0.186185	0.0125773		1:20	0.29182	0.106369		1:20	12.0525	7.35539		1:20	-0.0191557	-0.053052
1:20	-0.0433301	0.15655		1:20	-0.00714329	-0.0772665		1:20	13.8509	-7.00388		1:20	0.0392722	0.0127339
1:20	0.472102	-0.352899		1:20	0.0658627	-0.160064		1:20	-1.99329	-5.3907		1:20	0.127521	0.0849503
1:20	0.135135	0.108881		1:20	0.166477	0.123316		1:20	15.5974	3.43506		1:20	-0.0254225	0.06934
1:20	0.710934	-0.321088		1:20	0.198884	-0.250601		1:20	11.2255	2.16583		1:20	0.0293488	-0.0971036
1:20	0.308142	-0.361052		1:20	0.109247	0.170854		1:20	9.43414	4.44801		1:20	-0.0129686	0.0207834
1:20	0.3564	0.350425		1:20	0.173168	0.0428891		1:20	18.4008	12.0194		1:20	0.0126472	-0.0168199
1:20	0.652239	-0.389865		1:20	0.131833	-0.135338		1:20	14.8892	-1.49273		1:20	0.0633417	-0.0470303
1:20	0.387939	-0.208904		1:20	0.23225	0.128517		1:20	9.97339	1.73146		1:20	0.0402578	-0.058207
1:20	0.387415	-0.341396		1:20	0.250551	0.0514785		1:20	15.7381	6.00544		1:20	0.00251596	-0.0265709
1:20	0.399929	-0.0432674		1:20	0.15177	-0.0420387		1:20	11.6716	-0.185914		1:20	0.0191213	0.0277976
1:20	-0.355036	-0.557927		1:20	-0.0157878	0.258654		1:20	2.97002	9.54945		1:20	-0.0116236	-0.0158224
1:20	0.474368	-0.215796		1:20	0.239066	0.00976908		1:20	16.9068	4.55813		1:20	0.0401342	-0.0582808
1:20	0.502823	0.0565315		1:20	0.173657	-0.045566		1:20	16.4437	5.58146		1:20	0.0315895	-0.0115372
1:20	0.458082	-0.492868		1:20	0.222492	-0.198493		1:20	11.8828	-0.213461		1:20	-0.0083294	-0.0587332
1:20	0.106487	-0.503122		1:20	0.0243648	-0.145879		1:20	13.0686	2.75137		1:20	-0.0139859	-0.0754233
	0.586073				0.239785				18.0527				-4.3631e-05

## Sheet: S3 Fig
S3 Fig
This data is also used in Fig 3E
S3 Fig A				S3 Fig B				S3 Fig C				S3 Fig D
Trial number	Pref Paired	Pref Unpaired		Trial number	HC rate-modulation Paired	HC rate-modulation Unpaired		Trial number	Reorientation per HC Paired	Reorientation per HC Unpaired		Trial number	Run speed-modulation Paired	Run speed-modulation Unpaired
1	0.372737	-0.111584		1	0.0948148	-0.192767		1	14.3738	0.32967		1	-0.0515685	0.0514192
1	0.0221506	0.287679		1	0.221627	0.121817		1	5.10355	9.7928		1	0.0603861	0.045736
1	0.345006	-0.131104		1	0.176326	0.0704469		1	4.124	8.93666		1	0.0142292	-0.0214612
1	0.571511	0.179152		1	0.108758	0.0332865		1	14.7995	7.23898		1	0.0519856	0.0132039
1	-0.143894	0.505107		1	0.147313	0.07768		1	12.9026	11.7964		1	-0.014878	0.00632085
1	0.248154	0.227345		1	0.0456905	0.173876		1	13.4541	11.5137		1	0.00309319	0.0415703
1	-0.307056	0.357377		1	-0.109111	0.0723511		1	7.46869	9.22973		1	0.0962314	-0.0506933
1	0.252593	0.125976		1	0.0924458	0.0440537		1	5.76615	1.21333		1	0.00299027	-0.0656804
1	0.0771054	0.0160437		1	0.138588	-0.0179655		1	6.92358	4.02763		1	0.0209875	0.0155102
1	0.163452	0.17236		1	0.183899	0.0317309		1	5.56154	4.45592		1	-0.0549444	-0.0452602
1	0.1319	-0.188918		1	0.187857	0.148374		1	4.32961	14.7638		1	0.0324775	0.0190919
1	-0.147416	-0.348318		1	0.16777	-0.190127		1	8.14648	2.71099		1	0.101459	-0.0775145
1	-0.219328	-0.230905		1	0.0282132	-0.00612176		1	-5.3142	9.3025		1	0.0203577	0.00268614
1	0.779079	-0.181568		1	0.170428	-0.198048		1	10.2098	6.63656		1	0.0185578	0.0114708
1	0.575605	0.348887		1	-0.15425	0.225147		1	1.22652	10.5604		1	0.135637	-0.0735641
1	0.15733	-0.0117437		1	0.142936	0.300696		1	-0.216191	16.2472		1	0.0136022	-0.0209679
1	0.782184	0.72381		1	0.313605	0.0681549		1	11.0715	19.982		1	-0.0615965	0.115323
1	0.575714	0.228229		1	0.129204	0.0912119		1	11.6404	11.9332		1	0.0367778	0.0502414
1	-0.398481	-0.129627		1	-0.0236865	0.0349046		1	4.38656	10.0914		1	0.0675292	-0.0456189
1	0.197748	-0.27664		1	0.187975	0.317705		1	12.605	16.4536		1	-0.0018981	-0.00578536
1	0.656644	0.307136		1	0.213789	0.0402387		1	11.2785	11.0695		1	-0.00510214	-0.0652889
1	0.223115	0.442873		1	0.143041	0.0895248		1	12.379	-2.65598		1	0.0204039	0.0568922
1	0.468209	0.298516		1	0.262272	0.101103		1	12.2787	10.3113		1	0.0157153	-0.0907726
1	0.354964	0.00104624		1	0.0557333	0.035773		1	7.28194	3.85519		1	-0.000376612	-0.00701802
1	-0.129985	0.268509		1	0.208153	0.245546		1	10.0319	5.40488		1	0.0173092	0.0377874
1	-0.100042	0.170914		1	-0.14877	0.0904199		1	-2.50857	2.32206		1	0.198653	-0.108707
1	0.411155	-0.280637		1	0.13763	-0.0101344		1	17.4326	3.95122		1	0.0105719	-0.00840366
1	0.136572	-0.178456		1	0.224513	0.167769		1	10.334	9.45348		1	0.0491428	0.0223877
1	0.634133	0.0438185		1	0.263011	0.0836625		1	16.0727	5.93047		1	-0.0164147	-0.0133821
1	0.44094	0.142156		1	0.274791	0.109671		1	17.1225	10.5054		1	0.0358385	0.0263397
1	0.225947	0.089452		1	0.248066	0.220738		1	9.26242	10.7082		1		-0.00819849
1	0.252934	-0.231058		1	0.360785	0.111762		1	16.9903	7.80387		1	0.0419118	0.015006
1		0.0544414		1		0.200483		1		13.0103		1	0.0245783	0.0393098
1	0.598399	-0.218284		1	0.141548	0.0916528		1	5.40106	-1.65408		1	-0.00958652	0.127773
1	-0.664681	-0.199499		1	-0.365023	-0.0249341		1	-2.84091	8.64963		1	0.0170395	0.0129001
1	0.430804	-0.396908		1	0.290105	0.0252619		1	10.6964	3.67858		1	0.0709964	0.0677351
1	0.312476	-0.0329375		1	0.255121	0.0789517		1	12.5206	7.03228		1	0.014878	-0.0366263
1	0.26613	0.00152383		1	0.0974484	0.0206457		1	8.43022	3.8744		1	-0.00592325	-0.0117944
1	0.650051	0.703638		1	0.0447185	-0.0390535		1	9.48249	5.98309		1	0.0442514	-0.00386645
1		0.104626		1		0.197664		1		13.2392		1		0.0488679
1	0.368531	0.518513		1	0.0825649	0.17402		1	4.38336	17.6796		1	0.0174533	0.00788502
1	0.10901	-0.0579807		1	-0.0299462	0.12073		1	2.61253	4.22915		1	-0.0119875	0.0339483
1	0.363141	0.354519		1	0.347282	0.0430279		1	20.0845	2.62286		1	0.000934411	-0.0134342
1	0.144987	-0.25544		1	0.223733	0.0189744		1	11.7649	1.31003		1	-0.0224758	0.0220956
1	0.589943	0.264622		1	0.20255	0.0355509		1	16.4548	-2.84633		1	-0.105663	-0.0198105
1	0.34151	-0.0755955		1	0.131419	0.243462		1	17.0295	25.5095		1	0.033356	-0.000480834
1	0.466912	-0.552377		1	0.0358894	0.157681		1	18.6326	9.79797		1	0.011654	0.0108791
1	0.0866894	-0.0647771		1	0.125915	-0.286179		1	19.3449	-8.54661		1	0.0115591	-0.0427853
1	-0.0241648	0.276328		1	0.0626044	-0.0553919		1	15.6006	0.96968		1	-0.104959	-0.101656
1	0.68152	0.605248		1	0.09278	0.112805		1	11.8192	20.6924		1	-0.0177386	-0.0158086
1	0.664365	-0.0142231		1	0.410341	0.323443		1	17.6101	12.495		1	-0.0265314	-0.015771
1	0.380855	0.286723		1	0.18474	0.0726705		1	5.24172	11.4553		1	-0.0133306	0.0563655
1	0.1026	-0.131869		1	0.0967205	0.0455543		1	9.22532	5.94864		1	-0.0401451	-0.0360339
1	0.562939	0.0752612		1	0.239795	0.0217912		1	12.6161	4.30087		1	0.0159452	-0.000316336
2				2	-0.163312	-0.174035		2	-0.491293	-2.02964		2	0.0461004	-0.0306643
2				2	0.0195576	0.103382		2	12.1781	4.91601		2	0.0919259	0.00861358
2				2	-0.18055	0.0164755		2	1.12916	7.77078		2	0.00841333	0.0138705
2				2	0.183836	0.168617		2	-6.91001	18.8464		2	0.0792984	0.0773722
2				2	0.169396	-0.0105893		2	1.19873	10.1887		2	-0.102811	-0.0122555
2				2	0.347376	-0.11184		2	4.40853	5.49864		2	-0.018879	0.0354031
2				2	0.296661	0.0176319		2	12.0806	7.67989		2	0.0299065	0.142496
2				2	0.0872043	0.105506		2	7.27933	13.9032		2	0.0300023	-0.013469
2				2	0.657724	0.0494643		2	8.82455	7.62569		2	-0.00540799	0.0234595
2				2	0.185568	0.111563		2	10.2496	8.93249		2	0.087501	0.0902152
2				2	-0.00133934	0.176789		2	9.99234	8.35311		2	-0.0336837	0.0184035
2				2	0.129898	0.0626777		2	9.50382	3.05619		2	0.0215262	0.0026527
2				2	0.201892	0.103835		2	7.74764	-1.59242		2	-0.00829055	-0.158996
2				2	-0.00374	0.124656		2	3.67175	9.96156		2	0.128864	0.00622547
2				2	-0.0478913	0.1263		2	12.4069	1.63403		2	-0.0249359	0.0246718
2				2	-0.195339	0.0510319		2	6.48608	9.29082		2	0.0457089	0.0124122
2				2	0.145374	0.0664927		2	11.9041	-2.02063		2	0.028862	-0.0400301
2				2	0.125628	0.0662107		2	2.46959	2.53442		2	0.0411902	-0.126996
2				2	-0.00468177	-0.379039		2	6.41168	5.59871		2	0.0221602	-0.0205457
2				2	0.138433	0.0335919		2	-2.3038	1.97481		2	0.135387	-0.129445
2				2	0.117976	-0.23205		2	2.79655	9.33825		2	-0.0173933	0.0103288
2				2	0.0718008	-0.223683		2	8.32747	-8.84069		2	0.0590325	0.0807392
2				2	0.237329	0.109137		2	14.9097	7.25913		2	0.00972067	0.0433329
2				2	0.126358	0.216682		2	16.3417	6.78212		2	0.070792	-0.0516307
2				2	0.129261	0.034976		2	6.9738	8.7911		2	0.118534	0.0515797
2				2	0.278973	0.1571		2	11.4278	10.9675		2	-0.00744748	0.0412809
2				2	0.243478	0.0831718		2	10.9827	8.8711		2	0.155397	-0.00749561
2				2	0.146362	0.122092		2	5.74022	8.03437		2	-0.00718658	-0.0118647
2				2	0.217769	0.0519746		2	13.4205	7.08562		2	0.0339702	-0.0584727
2				2	0.292549	0.0692026		2	11.7019	5.72204		2	-0.00792573	-0.0440513
2				2	0.144535	0.0665623		2	23.7314	3.84297		2	0.0381253	0.0410542
2				2	0.0745528	-0.0369652		2	12.4685	7.92112		2	-0.0049588	-0.0295455
2				2	0.147774	0.0779171		2	12.2687	7.91882		2	-0.0182845	0.0633584
2				2	0.191832	0.152798		2	8.72055	5.91146		2	-0.02414	0.0368613
2				2	0.187152	-0.0832788		2	9.90596	6.65841		2	-0.00181383	-0.00441577
2				2	0.318661	-0.0559118		2	16.2488	0.0680491		2	0.0652341	-0.000841918
2				2	0.0148826	-0.177053		2	1.41656	3.90172		2	0.054626	-6.75525e-05
2				2	0.0283737	0.000980812		2	11.3572	-0.710943		2	0.0258842	-0.0601668
2				2	-0.242716	-0.0861736		2	2.60849	9.26686		2	0.167615	0.223108
2				2	0.119957	0.154525		2	9.95817	7.63282		2	-0.00183084	0.0431673
2				2	0.131122	-0.0847008		2	15.3479	0.7431		2	0.0893944	-0.024513
2				2	0.259051	0.0360926		2	7.3675	10.0127		2	-0.0426814	0.124527
2				2	0.100637	0.206831		2	8.69838	14.5781		2	0.0399066	0.00966068
2				2	0.256448	0.000132879		2	13.1267	9.1089		2	0.0377586	-0.055479
2				2		0.268614		2		11.6507		2		-0.0585357
2				2	0.151421	-0.0893394		2	17.7037	-11.7016		2	0.0226935	-0.0400457
2				2	-0.0100814	0.0511248		2	6.96661	6.09565		2	0.0757594	0.0925101
2				2	0.0838088	-0.0644345		2	13.4465	0.838419		2	0.0440022	0.0406115
2				2	0.0243793	0.221922		2	11.3251	7.75254		2	-0.00314243	-0.0553924
2				2	0.33778	-0.0268884		2	6.65156	10.0538		2	-0.068284	0.0952211
2				2	0.182294	0.286446		2	5.76089	8.29038		2	-0.00781727	0.0044348
2				2	0.00496616	0.0624221		2	1.89979	8.01021		2	0.043662	-0.044239
2				2	0.0712979	0.0495433		2	16.9297	-1.62815		2	0.0540968	-0.0576829
3				3	0.111272	-0.12514		3	7.33689	-3.13748		3	-0.0417475	-0.00755468
3				3	0.039384	0.0339639		3	8.84872	8.21937		3	0.0601702	-0.0820099
3				3	0.352125	0.243235		3	14.4678	3.63349		3	-0.148301	0.00719013
3				3	-0.290825	-0.140047		3	0.557649	-3.90716		3	0.0531343	0.0233097
3				3	0.245267	-0.320998		3	16.0167	-1.42275		3	-0.117678	0.0320456
3				3	0.199438	-0.173074		3	9.657	-10.6709		3	0.0215223	0.0626929
3				3	0.115812	0.140326		3	10.4171	10.5238		3	0.0682706	0.0499856
3				3	-0.0367768	0.196266		3	-0.363501	5.08373		3	0.0568368	0.0734741
3				3	0.274813	0.285193		3	11.4319	7.24147		3	0.00228797	0.0667095
3				3	0.196123	0.0136227		3	-8.16662	1.71313		3	0.0288597	-0.066279
3				3	0.0588292	-0.0897287		3	10.441	-11.9624		3	0.0122795	-0.0423975
3				3	-0.152595	-0.201844		3	7.11626	0.996092		3	0.330365	-0.122263
3				3	0.198758	-0.213413		3	10.1067	-9.50155		3	0.0349189	0.014131
3				3	0.0628956	0.318285		3	8.87654	34.3653		3	0.0665569	0.00193099
3				3	-0.226395	0.000691161		3	-1.8002	0.0372369		3	-0.0846888	0.0317262
3				3	0.120494	0.089127		3	-1.97702	8.75488		3	-0.198825	0.0250676
3				3	0.0243834	0.538582		3	13.1383	17.6573		3	0.097446	-0.181275
3				3	0.245415	0.422313		3	8.25783	6.3241		3	-0.123243	0.0747561
3				3	-0.0698911	0.0102493		3	6.43158	4.59646		3	-0.02988	-0.119833
3				3	-0.0620378	0.0488144		3	8.94711	-2.43289		3	-0.0199331	-0.0556476
3				3	0.0459932	-0.00844823		3	7.70747	5.8396		3	-0.0759628	-0.0361835
3				3	-0.114154	-0.100528		3	4.50795	-4.12267		3	-0.0747535	-0.0339466
3				3	0.0756565	-0.152171		3	-3.55392	2.39293		3	-0.00856277	-0.00234325
3				3	-0.194353	0.131117		3	-3.29692	11.6488		3	0.0952833	0.00741062
3				3	0.0239299	0.088434		3	4.9782	4.94322		3	-0.00431275	-0.043405
3				3	0.0603099	0.326234		3	3.64069	11.2386		3	-0.0149843	0.0387463
3				3	0.100077	0.0982723		3	21.8077	3.02409		3	0.180858	0.0851396
3				3	0.114461	-0.00322954		3	17.3998	1.39387		3	-0.00464413	0.0242482
3				3	0.216179	0.163323		3	15.0648	9.08752		3	0.00513638	-0.0074625
3				3	0.198217	0.0869498		3	9.17448	5.98454		3	0.09931	0.0221936
3				3	0.123695	0.113736		3	-0.736341	-1.52048		3	0.0427846	-0.0128308
3				3	0.691345	0.0172155		3	21.1419	9.7659		3	0.022402	0.0819448
3				3	0.252671	0.0753655		3	11.6526	2.83366		3	0.0287121	0.0433772
3				3	0.264796	0.153301		3	21.2704	7.97896		3	0.0585958	0.0163247
3				3	0.238487	0.0531547		3	18.2878	9.12329		3	0.00747631	0.014501
3				3	0.107735	0.0373489		3	12.9417	9.33142		3	0.00870727	-0.0469842
3				3	-0.218782	-0.163802		3	-4.95706	15.3295		3	-0.024515	-0.0522197
3				3	0.194444	0.0176366		3	16.2183	0.837075		3	0.0406882	0.0022825
3				3	0.226991	-0.0384616		3	14.8161	5.76011		3	0.0262086	-0.0335763
3				3	0.309483	-0.0376567		3	20.5893	3.1828		3	0.0294049	0.131287
3				3	0.113074	-0.316836		3	14.2473	-13.8101		3	0.0409338	-0.00515544
3				3	0.185809	-0.084125		3	14.1489	5.3675		3	-0.0162054	0.0458133
3				3	-0.207323	0.154369		3	12.2561	15.7294		3	0.109119	0.0111779
3				3	0.136804	0.083654		3	8.08342	3.72361		3	-0.0313117	-0.0389931
3				3	0.265302	0.0456181		3	11.4257	2.06207		3	-0.0277457	0.0163787
3				3	0.368804	-0.00454285		3	24.1227	0.479251		3	0.0090779	-0.024093
3				3		0.294428		3		2.84932		3	0.0454408	-0.114088
3				3	0.189843	0.0987412		3	6.64425	6.33324		3		0.0601668
3				3	0.636129	-0.160869		3	11.5694	0.597101		3	0.0341438	0.114061
3				3	0.166667	0.0287806		3	25.806	1.79467		3	0.026404	0.0563028
3				3	0.0775338	-0.0887446		3	-2.7506	7.70252		3	0.014527	-0.123555
3				3	-0.140868	0.123953		3	1.94792	11.3632		3	0.00738257	0.0804846
3				3	0.141845	-0.0338767		3	2.80206	2.39601		3	0.0203028	0.134449
3				3	0.157866	-0.119859		3	6.58764	14.6183		3	-0.00283892	0.042009
